# Supplementary material
Source: publisher figshare collection journal article supplement (https://tandf.figshare.com/articles/dataset/_/5346112)
Supplement: Supplementary file 1 [file 1]

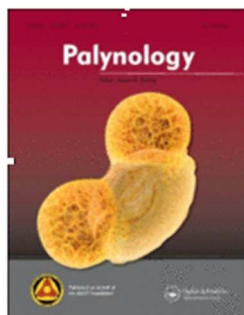

**New Albian to Cenomanian ovoidinioid dinoflagellate cysts  
taxa from East Greenland, Barents Sea and U.K.**

|                               |                                                                                                                                                                                                                           |
|-------------------------------|---------------------------------------------------------------------------------------------------------------------------------------------------------------------------------------------------------------------------|
| Journal:                      | <i>Palynology</i>                                                                                                                                                                                                         |
| Manuscript ID                 | TPAL-2017-0020                                                                                                                                                                                                            |
| Manuscript Type:              | Original Article                                                                                                                                                                                                          |
| Date Submitted by the Author: | 01-Mar-2017                                                                                                                                                                                                               |
| Complete List of Authors:     | Nøhr-Hansen, Henrik ; Geological Survey of Denmark and Greenland (GEUS), Stratigraphy<br>Costa, Lucy; Independent<br>Pearce, Martin; Evolution Applied<br>Alsen, Peter; Geological Survey of Greenland and Denmark (GEUS) |
| Keywords:                     | Upper Albian, Lower Cenomanian, dinoflagellate cysts, new species, new genera, systematic                                                                                                                                 |
|                               |                                                                                                                                                                                                                           |

SCHOLARONE™  
Manuscripts



24 *anaanae* gen. et sp. nov. The short stratigraphic ranges recorded for the taxa described are  
25 correlated to other stratigraphic dinoflagellate cyst markers and ammonites of mid-Cretaceous age.

26

27 **Keywords:** Upper Albian, Lower Cenomanian, dinoflagellate cysts, new species, new genera,  
28 systematic.

29

## 30 1. Introduction

31 Ovoidinioid peridinioid dinoflagellate cysts (cysts) of the genera *Epelidosphaeridia*, *Ovoidinium*  
32 and *Sidridinium* gen. nov. characterised by a tAtI archeopyle are in the rich late Albian to Early  
33 Cenomanian palynological assemblages from offshore wells in the Barents Sea, Norwegian Sea,  
34 northern North Sea, outcrop sections from North-East Greenland and borehole material from  
35 southeastern UK (Figure 1). All the species described and discussed here have short stratigraphic

36 ranges and are useful marker fossils in the region. As some of these species are scarce or absent

37 from sediments to the south of the study locations, their spacial distribution may help to delimit

38 palaeogeographic suites during the Albian–Cenomanian transition. The present study was instigated

39 by observations reported by Costa (1985) on Early and Late Cretaceous sections from the Barents

40 Sea, Norwegian Sea and northern North Sea. One of the ovoid forms first reported by Costa (1985)

41 became established as a particularly useful marker species for the Early Cenomanian due to its

42 abundance and short stratigraphic range. Despite remaining formally undescribed, this species

43 became well known in the biostratigraphic industry for over 30 years as “*Sidridinium borealis*”. It has

44 subsequently been informally recognised in the literature as the *Ovoidinium?* sp. 1 by Nøhr-Hansen

45 (1993, 2012) and Radmacher et al. (2014) but is now formally described here.

46

## 47 2. Material

1  
2  
3  
4  
5  
6  
7  
8  
9  
10  
11  
12  
13  
14  
15  
16  
17  
18  
19  
20  
21  
22  
23  
24  
25  
26  
27  
28  
29  
30  
31  
32  
33  
34  
35  
36  
37  
38  
39  
40  
41  
42  
43  
44  
45  
46  
47  
48  
49  
50  
51  
52  
53  
54  
55  
56  
57  
58  
59  
60

48 numerous palynological slides from several offshore Norwegian mid-Cretaceous dark mudstone  
49 successions and chalk borehole material from southeastern UK were studied. The material includes  
50 slides from the Norwegian wells 7120/7-2; 7120/8-2, 7119/12-1, 7119/12-2 processed by consulting  
51 companies and by the Norwegian Petroleum Directorate (NPD). Slides from Trunch Borehole, Norfolk  
52 UK from Evolution Applied Limited, Biostratigraphic consultants UK and numerous slides from  
53 onshore outcrop sections from Hold with Hope and Geographical Society Ø, North-East Greenland  
54 and Kangerlussuaq basins, South-East Greenland (Figure 1) processed by the former Geological  
55 Survey of Greenland (GGU) and by the Geological Survey of Denmark and Greenland (GEUS).  
56 The illustrated specimens from the Norwegian wells are stored by the Norwegian Petroleum  
57 Directorate (NPD, Professor Olav Hanssens vei 10, 4003 Stavanger, Norway). The specimens from  
58 Trunch Borehole are stored by Evolution Applied Limited, Biostratigraphic consultant  
59 Gloucestershire, GL7 3QQ UK. The type material and all the specimens from North-East Greenland  
60 marked with MGUH numbers are stored in the type collection of the Geological Museum of the  
61 University of Copenhagen (Øster Voldgade 5–7, DK-1350, Copenhagen K, Denmark).

63 **3. Ovoidinioid peridinioid cysts genera with a tAtl archeopyles**

64 Peridinioid dinocysts with combination archeopyles formed by all four apical and three anterior  
65 intercalary plates (tAtl) as in the subfamily Ovoidinioideae, are known from ?Hauterivian to Early  
66 Cenozoic (Fensome et al. 1993), whereas many published species (with this type of archeopyle) of  
67 the genera *Ascodinium*, *Epelidosphaeridia* and *Ovoidinium* seem to be further restricted to the  
68 Albian and Cenomanian.  
69 *Ascodinium*, established by Cookson and Eisenack (1960) and emended by Helenes, 1983 includes  
70 circumcavate cysts with endophragm that is slightly thicker than the periphragm, with or without  
71 short apical and left antapical horns, a cingulum that is not or weakly indicated, a peridinioid

72 tabulation (when expressed), and an archeopyle of the type tAtl (1'–4' + 1a–3a) that is angular to  
73 rounded.

74 *Ovoidinium* was first described by Davey (1970) and emended by Lentin & Williams (1976). It  
75 encompasses bicavate peridinioid cysts with a relatively thick endophragm enveloped by a thinner  
76 periphragm, a tabulation not or only poorly expressed, a distinct cingulum, and an archeopyle type  
77 tAtl (1'–4' + 1a–3a) with a relatively wide margin that is commonly slightly angulose.

78 The narrow subcircular archeopyle outline and the continuous ambital pericoel that distinguish  
79 *Ascodinium* from the bicavate *Ovoidinium* (which in addition, has a wider and more angulose  
80 archeopyle margin), were taken by Helenes (1983) to be discriminatory only at the specific level.  
81 Helenes (1983) considered that the similarity in cyst type, relative thickness of the walls, shape of  
82 the endophragm, and archeopyle style justified the transference of all *Ovoidinium* species into  
83 *Ascodinium*, the former then becoming a junior synonym of the latter; however, Lentin & Williams  
84 (1989, p. 269) retained *Ovoidinium*.

85 Although overall morphology, archeopyle type and overlapping stratigraphic ranges indicate close  
86 affinities between *Ascodinium* and *Ovoidinium*, the differences between them are consistent with  
87 generic discriminations in fossil peridiniacean cysts. The similarities between the two genera suggest  
88 that they may have derived from a common ancestor, but morphological divergence appears to have  
89 taken place at an earlier stage in the evolution of this lineage. The morphological features  
90 distinguishing *Ascodinium* from *Ovoidinium* are clear and stable, readily permitting the assignment  
91 of a species to one or the other.

92 *Epelidosphaeridia* was erected by Davey (1969) to accommodate *Palaeoperidinium spinosum*,  
93 described by Cookson & Hughes (1964) from the upper Albian to Lower Cenomanian of SE England.  
94 *Epelidosphaeridia spinosa* has a pentagonal ambitus with very short apical and antapical horns, a  
95 dense cover of stout, atabular processes, a cingulum sometimes marked by aligned processes and an  
96 archeopyle located on the cysts apex. This species was originally described by Cookson & Hughes

1

2

397 (1964) as single-walled. From his observations of European and Canadian material, Davey (1969)

4

598 concluded that *E. spinosa* was a double-walled cyst, although in the a modified description of the

6

799 genus, Stover & Evitt (1978) restated the cyst was formed only by an autophragm. From the curved

8

9100 to nearly straight shape of the archeopyle’s dorsal margin, and its more posterior position relative to

10

11101 the ventral margin, Stover & Evitt (1978) inferred a possible involvement of intercalary plates in

12

13102 archeopyle formation. However, due to its indistinct tabulation and uncertain archeopyle type, the

14

15103 affinities of *Epelidosphaeridia* remained uncertain.

16

17

18

19104

20

21

22105

23

24

25

26

27

28

29

30

31

32

33

34

35

36

37

38

39

40

41

42

43

44

45

46

47

48

49

50

51

52

53

54

55

56

57

58

59

60

3. Systematic palaeontology

Division **Dinoflagellata** (Bütschli 1885) Fensome et al. 1993

Class **Dinophyceae** Pascher 1914

Family **Peridiniaceae** Ehrenberg 1831

Subfamily **Ovoidinioideae** (Norris, 1978) Bujak & Davies, 1983.

*Epelidosphaeridia* Davey 1969, **emend.**

**Type:** *Epelidosphaeridia spinosa* (Cookson & Hughes) Davey 1969

The generic diagnosis of *Epelidosphaeridia* is here emended to include the following features:

- Peri- and endophragm in close contact throughout or forming pericoels on parts of the cyst, which then varies from cornucavate to bicavate.
- Tabulation of 4', 3a, 7'', 5c, 5''', 2''''', Xs. Expression of the tabulation varies in different species and also on different specimens of a same species.
- archeopyle type tAtl (1'–4' + 1a–3a)

119

120

*Epelidosphaeridia spinosa* Cookson & Hughes 1964 ex Davey 1969

121

Plate 1, Figures 4–6

122

1964 *Palaeoperidinium spinosum* Cookson & Hughes: p. 49, plate. 8, figures 6–8.

123

1969 *Epelidosphaeridia spinosa* (Cookson & Hughes) Davey: p. 143.

124

125

**Description.** This species includes small acavate cysts with reduced apical and left antapical horns

126

and an absent or very reduced right antapical horn. The peri- and endophragm, are closely

127

appressed throughout and indiscernable. The processes consist of densely arranged, atabular short

128

~~spines with blunt tips~~ The cingulum may be partially discernable through alignment of the processes

129

along its margin; and when observable, is narrow and unindented.

130

The archeopyle is type (1'–4' + 1a–3a) with wide, with a weakly angulose margin.

131

**Distribution.** Upper Albian to middle Cenomanian, North Western Europe, North Sea, Barents Sea,

132

Greenland, USA, Arctic Canada.

133

134

 *Epelidosphaeridia manifesta* sp. nov.

135

Plate 1, Figures 7–16

136

**Derivation of name.** Latin “manifestus” clear, expressed.

137

**Holotype.** Plate 1 Figure 7 GGU sample no. 487643-3 EF F52-4.

138

**Type locality.** Section HNH081410-4, East of Fosdalen, north Hold with Hope, North-East Greenland

139

(73°52'N; 20°43'W).

1  
2  
3  
4  
5  
6  
7  
8  
9  
10  
11  
12  
13  
14  
15  
16  
17  
18  
19  
20  
21  
22  
23  
24  
25  
26  
27  
28  
29  
30  
31  
32  
33  
34  
35  
36  
37  
38  
39  
40  
41  
42  
43  
44  
45  
46  
47  
48  
49  
50  
51  
52  
53  
54  
55  
56  
57  
58  
59  
60

140     **Diagnosis.** A cornucavate to bicavate species of *Epelidosphaeridia*. Short apical and left antapical  
141     horns; right antapical horn reduced or absent. Ornament of solid, very short, rod-like processes,  
142     mainly sutural in distribution; base of the processes sometimes coalescing into very low sutural  
143     ridges. Tabulation formula of 4', 3a, 7'', 5c, 5''', 2'''''. Cingulum relatively wide, faintly indented,  
144     tabulated. Archeopyle type tAtl, with a wide, weakly angulose margin. Operculum simple, free or  
145     adnate.

146     **Description.** Cysts dorsoventral compressed, with an asymmetrical peridinioid ambitus. Apical horn  
147     short, broadly triangular, distally blunt and occasionally bearing an apical pore. Left antapical horn  
148     short, acuminate. Right antapical horn usually absent but a lobe or a rod-like process may occur in  
149     its place (e.g. Plate 1, Figure 15). Endocyst ambitus elliptical. The pericoels are commonly restricted  
150     to the horns' cavities, but wider apical and antapical pericoels and partial ambital pericoels may  
151     occur (e.g. Plate 1, Figure 14). Endophragm smooth. Periphragm also smooth, bearing a moderate  
152     number of solid, short processes, mainly sutural in distribution; a variable, but generally small  
153     number of intratabular process may also occur. The processes are stout, rod-like, and distally simple,  
154     with buccinate, oblate or occasional capitate endings. The expanded bases of the sutural processes  
155     may coalesce forming low, partial sutural ridges (e.g. Plate 1, Figure 7). A tabulation formula of 4', 3a,  
156     7'', 5c, 5''', 2''''', Xs, is commonly expressed by the sutural ornament.

157     The cingulum is flanked by two low, continuous or broken ridges formed by the coalescing bases of  
158     the processes. It is moderately helicoid, only slightly indented and wide relative to the overall cyst  
159     diameter. The cingular surface also bears a few sutural processes or low ridges. The sulcus is shallow  
160     and wide on the hypocyst, becoming narrower and deeper on the epicyst; its surface is free of  
161     ornament.

162     The archeopyle type is tAtl (1'–4' + 1a–3a), with wide, somewhat angulose margins on which the  
163     precingular edge of the three intercalary plates may be distinct. The operculum is simple, free or  
164     adherent.



165 **Dimensions.**

166 Greenland specimens:

167 Holotype: Pericyst length 62  $\mu\text{m}$ , breadth 55  $\mu\text{m}$ ; endocyst length 44  $\mu\text{m}$ ; apical horn 8  $\mu\text{m}$ ; antapical  
168 horns, left 7  $\mu\text{m}$ , right, 3  $\mu\text{m}$ ; processes up to 3  $\mu\text{m}$ .

169 Range: Pericyst length 57 (65) 76  $\mu\text{m}$ , breadth 49 (56) 64  $\mu\text{m}$ ; endocyst length 42 (46) 52  $\mu\text{m}$ ; apical  
170 horn 5 (7) 10  $\mu\text{m}$ ; antapical horns, left 4 (7) 9  $\mu\text{m}$ , right 2 (3) 3  $\mu\text{m}$ ; processes up to 4  $\mu\text{m}$  (6  
171 specimens).

172 Norwegian specimens:

173 Range: Pericyst length 64 (71) 83  $\mu\text{m}$ , breadth 49 (59) 66  $\mu\text{m}$ , endocyst length 48 (58) 64  $\mu\text{m}$ , apical  
174 horn 4 (8) 12  $\mu\text{m}$ , antapical horns left 5 (7) 9  $\mu\text{m}$ , right 0 (2) 5  $\mu\text{m}$ . Ornament up to 5  $\mu\text{m}$  (11  
175 specimens).

176 **Distribution.** *Epelidosphaeridia manifesta* sp. nov. has only been recorded from a narrow interval in  
177 the Lower Cenomanian, it has a FO and LO slightly older than the FO and LO of *Ovoidinun*  
178 *epelidosphaeroides* sp. nov.

179 **Comparison.** *Epelidosphaeridia manifesta* sp. nov. differs from *E. spinosa* in having wider, clearly  
180 developed pericoels; a smaller number of processes, most of which are sutural, and partially  
181 developed sutural ridges. *Epelidosphaeridia manifesta* sp. nov. resembles, and appears to grade  
182 morphologically into *Ovoidinium epelidosphaeroides* sp. nov. specimens with few sutural processes  
183 (e.g. Plate 2 Figures 13–16), from which it differs in its more reduced pericoel width, more numerous  
184 processes and in lacking a cingular flange. There appears to be a continuous morphological transition  
185 between *Epelidosphaeridia* sp. 1 of Nøhr-Hansen 1993, *E. spinosa*, *E. manifesta* sp. nov. and  
186 *Ovoidinium epelidosphaeroides* sp. nov.

187

188 *Epelidosphaeridia* sp. 1 Nøhr-Hansen 1993.

1  
2  
3  
4  
5  
6  
7  
8  
9  
10  
11  
12  
13  
14  
15  
16  
17  
18  
19  
20  
21  
22  
23  
24  
25  
26  
27  
28  
29  
30  
31  
32  
33  
34  
35  
36  
37  
38  
39  
40  
41  
42  
43  
44  
45  
46  
47  
48  
49  
50  
51  
52  
53  
54  
55  
56  
57  
58  
59  
60

189 Plate 1, Figures 1–3

190 1993 *Epelidosphaeridia* sp. 1; Nøhr-Hansen, p. 66, plate 8, figures 11– 12.

191 **Comments.** *Epelidosphaeridia* sp. 1 Nøhr-Hansen 1993 closely resembles *Epelidosphaeridia spinosa*

192 in size and shape, but differs from it by only having only a weakly developed cingulum and by its

193 slightly shorter spines. The available material is considered too small to establish a new species.

194 **Distribution.** *Epelidosphaeridia* sp. 1 Nøhr-Hansen 1993 has a FO in the middle part of upper Albian,

195 below the FO of *Epelidosphaeridia spinosa* and a LO in Lower Cenomanian.

196

197 Genus ***Ovoidinium*** Davey 1970

198 Type: ***Ovoidinium verrucosum*** (Cookson & Hughes) Davey 1970

199 ***Ovoidinium epelidosphaeroides* sp. nov.**

200 Plater 2, Figures 1– 16; Plate 7, Figures 10–12

201 1993 *Ovoidinium* sp. 2; Nøhr-Hansen, p. 92, plate 16, figures 5–8.

202 **Derivation of name.** “epelidosphaeroides” refers to the morphological resemblance of this species

203 to *Epelidosphaeridia*.

204 **Holotype.** Plate 2, Figure 1 GGU sample no. 522081-4 EF Z21-2.

205 **Type locality.** Section 30 of Nøhr-Hansen 1993 and GEUS PAL-3/2011, Tværdal, Geographical Society

206 Ø, North-East Greenland (72°58’N; 23°02’E).

207 **Diagnosis.** A bicavate to circumcavate species of *Ovoidinium* with a pentagonal ambital outline, a

208 short apical horn and one or two reduced antapical horns, of which the right is commonly vestigial.

209 Cingulum marked on the dorsal face by a flange. Sulcus indicated by low ridges. Periphragm smooth

210 (Plate 2, Figures 1–12) or bearing a few short, solid, sutural processes with a simple or buccinate tip.

211 Tabulation not or only poorly expressed. Archeopyle tAtl ( $1'-4' + 1a-3a$ ), with a wide, angulose  
 212 dorsal margin (Plate 2, Figures 2, 11; Plate 7, Figure 11), and a gently curved ventral margin that is  
 213 more anteriorly located than the dorsal margin.

214 **Description.** Small to medium-sized, dorsoventrally compressed bicavate cysts. The pericyst ambitus  
 215 is subpentagonal, slightly asymmetrical. The epicyst ambitus is triangular, terminating in a short  
 216 apical horn distally blunt and occasionally bearing an apical pore. The hypocyst, commonly larger  
 217 than the epicyst, is trapezoidal with a slanted antapex. The left antapical horn is broad, distally  
 218 acuminate and may be reduced; the right antapical horn is reduced or absent. The endocyst ambitus  
 219 is circular to elliptical. Peri- and endophragm are in contact along the central portions of the cyst but  
 220 separate anteriorly and posteriorly to form pericoels of variable width. Periphragm hyaline, smooth  
 221 or with faint longitudinal striations. The periphragm may bear a small number of solid, rod-like, 1–3  
 222  $\mu\text{m}$  long, sutural processes with a simple, buccinate or capitate tip, and sometimes also partially  
 223 developed low, sutural ridges (Plate 2, Figures 13–16; Plate 7, Figure 10). The endophragm is smooth.  
 224 The cingulum is marked on the dorsal side by a prominent flange, formed by a fold on the  
 225 periphragm. A double row of sparse processes distributed along incomplete sutural ridges are often  
 226 observable on the cyst's ventral face. The sulcus, flanked by distally smooth or denticulate ridges is  
 227 broad and shallow, and occupies most of the ventral face (Plate 2, Figure 1; Plate 9, Figure 10).

228 Archeopyle type tAtl ( $1'-4' + 1a-3a$ ) with wide margins. The precingular edge of the three intercalary  
 229 plates forms a distinct indentation on the archeopyle's dorsal margin. The archeopyle's ventral  
 230 margin is straight or gently curved, and lies closer to the apex than its dorsal margin. The operculum  
 231 is simple, free or adherent.

232 Tabulation partially expressed by the cingulum, the archeopyle margins and the distribution of the  
 233 ornament when present. A nodular inclusions which may correspond to an **ophthalmus**, often occur on  
 234 the inner side of the endocyst (e.g. Plate 2, Figures 1, 3, 13).

1  
2  
3  
4  
5  
6  
7  
8  
9  
10  
11  
12  
13  
14  
15  
16  
17  
18  
19  
20  
21  
22  
23  
24  
25  
26  
27  
28  
29  
30  
31  
32  
33  
34  
35  
36  
37  
38  
39  
40  
41  
42  
43  
44  
45  
46  
47  
48  
49  
50  
51  
52  
53  
54  
55  
56  
57  
58  
59  
60

235     **Dimensions.**

236     Greenland specimens:

237     Holotype: Pericyst length 74  $\mu\text{m}$ , breadth 66  $\mu\text{m}$ ; endocyst, 51  $\mu\text{m}$  x 51  $\mu\text{m}$ ; apical horn 7  $\mu\text{m}$ ;

238     antapical horns, left. 8  $\mu\text{m}$ , right, 2  $\mu\text{m}$ .

239     Range: Pericyst length 71 (73) 80  $\mu\text{m}$ , breadth 59 (62) 68  $\mu\text{m}$ ; endocyst, 48 (53) 68  $\mu\text{m}$  x 51 (55) 60

240      $\mu\text{m}$ ; apical horn 7 (9) 10  $\mu\text{m}$ ; antapical horns, left. 5 (9) 13  $\mu\text{m}$ , right, 0 (2) 3  $\mu\text{m}$ ; when present

241     processes up to 3  $\mu\text{m}$  (7 specimens).

242     Norwegian Specimens:

243     Range: Pericyst length 73 (77) 87  $\mu\text{m}$ , breadth 57 (65) 71  $\mu\text{m}$ ; endocyst, 46 (57) 66  $\mu\text{m}$  x 57 (64) 71

244      $\mu\text{m}$ ; apical horn 5 (7) 12  $\mu\text{m}$ ; antapical horns, left. 3 (10) 16  $\mu\text{m}$ , right, 0 (4) 7  $\mu\text{m}$ ; when processes up

245     to 5  $\mu\text{m}$  (15 specimens).

246     **Comparisons.** The pentagonal ambital outline, the cingular flange and the presence of processes and

247     partially developed sutural ridges, distinguish *O. epelidosphaeroides* sp. nov. from all other

248     *Ovoidinium* species. The ambital outline of this species resembles that of *Yalkalpodinium scutum*

249     Morgan 1980, but the archeopyle of the latter has been interpreted as a type tA and its tabulation as

250     gonyaulacoid. *Ovoidinium epelidosphaeroides* sp. nov. resembles ~~*Epelidosphaeridia*~~ in the wide,

251     faintly angular archeopyle margins and in the shape of the short processes when these occur. It

252     differs in having well defined, wide pericoels, a cingular flange, and only a small number of processes.

253     **Distribution.** The species was first reported from Troms and Hammerfest basins offshore north-west

254     Norway (Costa 1985) and later described as *Ovoidinium?* sp. 2 by Nøhr-Hansen (1993) from North-

255     East Greenland.

256     **Age.** FO and LO in the Early Cenomanian. A latest late Albian to ?Early Cenomanian age was

257     tentatively given by Nøhr-Hansen (1993).

258

259 *Sindridinium* gen. nov.

260 **Type species.** *Sindridinium borealis* gen. et sp. nov.

261 **Derivation of name.** Sindri, from the Norse (North Germanic language) sindr: ("spark") is the name  
 262 of both a dwarf, and of the hall where the souls of the virtuous will dwell after Ragnarök. The  
 263 informal name "*Sidridinium*" often used in consulting biostratigraphic reports is incorrectly spelled.

264 **Diagnosis.** Small dinocysts represented by two-layered dorsoventrally compressed forms with an  
 265 oval to subcircular ambital outline, and absent or vestigial horns. The endo- and periphragm may be  
 266 entirely tightly adpressed or separated posteriorly, forming a narrow antapical pericoel. Periphragm  
 267 thin, smooth or ornamented by nontabular grana, verrucae or tubercles. The endophragm is thinner  
 268 than the periphragm and presumably smooth. Cingulum and sulcus are indistinct or, rarely  
 269 suggested by folds, grana or verrucae on the periphragm.

270 **Archeopyle** located on the apex, presumably of type tAtl (1'–4' + 1a–3a) but reduced. Relatively  
 271 narrow archeopyle margins of which the dorsal is straight to subrectangular or rarely slightly  
 272 angulose, and lies closer to the antapex than the gently curved ventral margin. Operculum simple,  
 273 free or adnate.

274 **Discussion.** The cavate and non cavate forms share sufficient morphological features to leave no doubt as  
 275 to their congenecity. Due to the lack of a clear tabulation and its relatively smooth margins, the identity  
 276 of the archeopyle in *Sindridinium* gen nov. remains somewhat problematic. The interpretation of a tAtl  
 277 archeopyle is based on:

- 278 - the smooth to weakly angulose (not zig-zag) margins, devoid of accessory sutures;
- 279 - **more posterior position of the dorsal margin relative to the ventral margin**, and its straight to  
 280 slightly indented shape;
- 281 - **absence of an offset sulcal notch on the ventral margin of the archeopyle**, which suggests the  
 282 involvement of intercalary plates;

1  
2  
3 283 - the relatively narrow margin has a subtriangular, symmetrical ventral side and a weakly polygonal  
4  
5 284 to subrectangular dorsal side, suggesting the presence of a series of reduced intercalary plates.  
6  
7  
8 285 If the interpretation of the archeopyle is correct, then this is of a same type as in *Ovoidinium*. The  
9  
10 286 presence of the non cavate forms, the absence of apical and antapical horns (i.e. not cornucavate),  
11  
12 287 the absence of a clear cingulum on the pericyst and the narrower, less angulose archeopyle margins,  
13  
14 288 distinguish *Sindridinium* gen nov. from *Ovoidinium*. Narrower, subcircular archeopyle margins and a  
15  
16 289 poorly defined cingulum are known within the range of variability of *Ovoidinium*, suggesting that the  
17  
18 290 two genera may be closely related.  
19

20  
21 291

22  
23  
24 292 ***Sindridinium borealis* gen. et sp. nov.**

25  
26  
27 293 Plate 3, Figures 1–16; Plate 4, Figures 1–12; Plate 5 Figures 1–9

28  
29  
30 294 1993 *Ovoidinium*? sp. 1; Nøhr-Hansen, p. 91, plate. 24, figures. 5–6, 11,14.

31  
32 295 2014 *Ovoidinium*? sp. 1; Radmacher et. al., p 116; plate 2, figures g, h.

33  
34 296 **Derivation of name.** “*Boreas*” Greek North.

35  
36  
37 297 **Holotype.** Plate 3, Figure 1 GGU sample no. 522076-4 EF U53-1.

38  
39 298 **Type locality.** Section 30 of Nøhr-Hansen 1993 and GEUS PAL-3 2011, Tværdal, Geographical Society  
40  
41  
42 299 Ø, North-East Greenland (72°58’N; 23°02’W).

43  
44 300 **Description.** Double-walled dinocysts with oval to slightly elongate ambital outline. The endo- and  
45  
46 301 pericystphragm are entirely tightly compressed and only recognised at the archeopyle margins (e.g.  
47  
48 302 Plate 3, Figures 7, 15; Plate 5 Figure 3), horns absent. Endophragm thin (<1 µm), perihragm normally  
49  
50 303 thicker (>1 µm), smooth (e.g. Plate 3, Figures 1, 11; Plate 5 Figures 1, 6) or bearing scattered non-  
51  
52 304 tabular grana, verrucae or tubercles; the density of the ornament varies on different individuals.  
53  
54 305 Tabulation not expressed. Cingulum and sulcus are occasionally indistinct or, rarely, suggested by  
55  
56 306 folds, grana, verrucae or tubercles on the periphragm (e.g. Plate 3, Figure 2; Plate 5 Figure 3). On  
57  
58  
59  
60

some specimens, the periphragm has been affected by microbiological activity (Plate 5, Figure 4). One or two large nodular inclusions and a variable number of smaller ones, which may correspond to an omphalus, occasional occur on the inner side of the endocyst (e.g. Plate 3, Figures 1, 4, 16). Archeopyle type tAtl. The archeopyle margins are weakly angulose and relatively narrow. Its dorsal margin, when well preserved, is straight to subrectangular or rarely slightly angulose, and lies closer to the antapex than the slightly narrower, curved ventral margin. A conspicuous v-shaped notch appears on many of the southeast UK specimens (Plate 4, Figures 5, 8, 11) and on some of the specimens from the Norwegian/Greenland seas (Plate 3, Figures 8, 16; Plate 5, Figure 4). A possible tabulation pattern may be recognized on a single specimen (Plate 4, Figure 10); however no plate-boundary marks have been recognised on the specimens studied by scanning electron microscope (SEM; Plate 5). A small separation between peri- and endophragm may be observable along the archeopyle margins. The operculum is free or adnate (Plates 3–5).

#### 319 **Dimensions.**

320 Greenland specimens:

321 Holotype: Pericyst length 63  $\mu\text{m}$ , breadth 52  $\mu\text{m}$ , width of archeopyle 21  $\mu\text{m}$ .

322 Range: Cysts with operculum in situ: length 50(64) 86  $\mu\text{m}$  x breath 40 (53) 77  $\mu\text{m}$ , width of  
323 archeopyle 19 (23) 35  $\mu\text{m}$  (15 specimens). Cysts without operculum: Length 47 (60) 73  $\mu\text{m}$  x breath  
324 48 (55) 62  $\mu\text{m}$ , width of archeopyle 17 (22) 31  $\mu\text{m}$  (15 specimens).

325 Norwegian specimens:

326 Range: Length 47 (54) 66  $\mu\text{m}$  x breath 45 (52) 52  $\mu\text{m}$  (14 specimens).

327 UK specimens:

328 Range: Length 39(49.3)58  $\mu\text{m}$  x breath 31(42.8)54  $\mu\text{m}$  (30 specimens).

329 **Distribution.** The species was first reported from Troms and Hammerfest basins offshore north-west  
330 Norway (Costa 1985) and later described as *Ovoidinium?* sp. 1 from North-East Greenland (Nøhr-

1  
2  
3  
4  
5  
6  
7  
8  
9  
10  
11  
12  
13  
14  
15  
16  
17  
18  
19  
20  
21  
22  
23  
24  
25  
26  
27  
28  
29  
30  
31  
32  
33  
34  
35  
36  
37  
38  
39  
40  
41  
42  
43  
44  
45  
46  
47  
48  
49  
50  
51  
52  
53  
54  
55  
56  
57  
58  
59  
60

331 Hansen 1993). Recently *Ovoidinium?* sp. 1 has been recorded from the Troms and Hammerfest  
332 basins offshore north-west Norway (Radmacher 2014) and from the Trunch Borehole, Norfolk  
333 southeastern UK

334 **Stratigraphic range.** Resampling and restudy of the approximately 415 m thick succession in Tværdal  
335 on Geographical Society Ø (section 30 of Nøhr-Hansen 1993, Pal-3/2011, Figure. 2) have revealed a  
336 horizon with an assemblage of the ammonite *Schloenbachia varians* from 349 m indicating an  
337 earliest Cenomanian age (*Mantelliceras mantelli* - *dixonii* ammonite Zones, undivided). The  
338 ammonite level corresponds to the lower part of the *S. borealis* gen. et sp. nov. acme, whereas the  
339 FO of *S. borealis* gen. et sp. nov. occur at a lower level, presumably of latest Albian age (Figures 2, 5).  
340 The ammonite correlated age obtained from North-East Greenland correspond to the observations  
341 from the Ferriby Chalk Formation in the Trunch Borehole, Norfolk southeastern UK where *S. borealis*  
342 gen. et sp. nov. first occur from the *Mantelliceras mantellii* Zone (questionably above the Lower  
343 Cenomanian  $\delta^{13}\text{C}$  Event I and below the  $\delta^{13}\text{C}$  Virgatus Beds Event of Jarvis et al. 2006) to the  
344 *Mantelliceras dixonii* Zone (LO immediately below the middle Cenomanian I Event; Lower  
345 Cenomanian) in the Trunch borehole (Figure 6). Radmacher et. al. (2014) reported a late Abian age.

346 **Comparisons.** *Sindridinium borealis* gen. et sp. nov. differs from *Fromea amphora* which has a circular  
347 margin to its apical pylome, and equatorial folds. The nodular inclusions occasionally observed in the  
348 location of an omphalus in *Sindridinium* gen. nov. never seem to occur in *Fromea amphora*. *Hexagonifera*  
349 *glabra*, from the Senonian of Australia (Cookson & Eisenack 1961), somewhat resembles *S. borealis* gen.  
350 et sp. nov. but its archeopyle is type I (2a). Isolated endocysts of *Leberidocysta* may resemble *S. borealis*,  
351 but *Leberidocysta* possesses a clear tA archeopyle with a well-marked offset sulcal notch. *S. borealis* gen.  
352 et sp. nov. differs from *S. anaanae* gen. et sp. nov. by being non cavate.

353

354  ***Sindridinium anaanae* gen. et sp. nov.**



355 Plate 6, Figures 1–16; Plate 7, Figures 1–9

356 1993 *Ovoidinium?* sp. 1; Nøhr-Hansen, p. 91, plate. 24, figures. 7–10, 12, 13.

357 2012 *Ovoidinium* sp. 1; Nøhr-Hansen, plate. 1, figures. 14, 15.

358 **Derivation of name.** Greenlandic “anaana” for mother.

359 **Holotype.** Plate 5, Figure 1 GGU sample no. 518602-7 EF M32-1.

360 **Type locality.** Section JHOV-2/2009, Snertadal, north Hold with Hope, North-East Greenland

361 (73°52.122'N; 20°37.993' W).

362 **Description.** Double-walled hypocavate cysts, dorsoventral compression moderate. Pericyst ambitus

363 slightly elongate, endocyst ambitus oval to subcircular. Periphragm and endophragm are in close

364 contact over apical and central portions of the cyst, separating posteriorly to form a narrow

365 hypocystal pericoel. The pericyst's antapex is rounded (e.g. Plate 6, Figure 11) to weakly lobate (e.g.

366 Plate 5, Figure 1). Apical horn absent or vestigial, cyst apex rounded or slightly angulose.

367 Endophragm thin (<1 µm), periphragm normally thicker (>1 µm), smooth or bearing scattered non-

368 tabular grana, verrucae or disc-like tubercles; the density of the ornament varies on different

369 individuals from almost none (e.g. Plate 7, Figures 3, 4) to almost cover the entire periphragm (e.g.

370 Plate 7, Figures 8, 9). In poorly preserved specimens where the periphragm (and pericoel) may be

371 absent, the shape of the endocyst can be used to distinguish the subcircular *S. anaanae* gen. et sp.

372 nov. from the ovoid to elongate *S. borealis* gen. et sp. nov. (Plate 6, Figure 12). On some specimens,

373 the periphragm has been affected by microbiological activity (Plate 6, Figures 12, 13). One or two

374 large nodular inclusions and a variable number of smaller ones, which may correspond to an

375 omphalus, occasionally occur on the inner side of the endocyst (e.g. Plate 6, Figures 13, 15).

376 Tabulation not expressed. Cingulum and sulcus absent, although occasionally the periphragm may

377 be folded in their place. Archeopyle type tAtl. The archeopyle margins are weakly angulose and

378 relatively narrow. Its dorsal margin, when well preserved, is straight to subrectangular or rarely

1  
2  
3  
4  
5  
6  
7  
8  
9  
10  
11  
12  
13  
14  
15  
16  
17  
18  
19  
20  
21  
22  
23  
24  
25  
26  
27  
28  
29  
30  
31  
32  
33  
34  
35  
36  
37  
38  
39  
40  
41  
42  
43  
44  
45  
46  
47  
48  
49  
50  
51  
52  
53  
54  
55  
56  
57  
58  
59  
60

379 slightly angulose and lies closer to the antapex than the slightly narrower, curved ventral margin. A  
380 small separation between peri- and endophragm may be observable along the archeopyle margins.  
381 The operculum is free or adherent.  
382 Specimens with a lobate antapex tend to have a more pointed apex/operculum (Plate 6, Figures 1–4),  
383 whereas the more seldom hypocystal elongate/egg-shaped specimens have a more rounded apex  
384 (Plate 6, Figures 8, 9) as on *S. borealis* gen. et sp. nov.

385 **Dimensions.**

386 Greenland specimens:

387 Holotype: Pericyst length 63  $\mu\text{m}$  x breath 55  $\mu\text{m}$ , length endocyst 54  $\mu\text{m}$ , width of archeopyle 33  
388  $\mu\text{m}$ .

389 Range: Cysts with operculum in situ: Pericyst length 53 (62) 68  $\mu\text{m}$  x breath 44 (53) 56  $\mu\text{m}$ ; length  
390 endocyst 48 (54) 60  $\mu\text{m}$ , width of archeopyle 26 (28) 31  $\mu\text{m}$  (11 specimens).

391 Cysts without operculum: Pericyst 44 (54) 58  $\mu\text{m}$  x breath 44 (52) 58  $\mu\text{m}$ ; length endocyst 39 (46) 50  
392  $\mu\text{m}$ , width of archeopyle 25 (30) 35  $\mu\text{m}$  (11 specimens).

393 Norwegian specimens:

394 Range: Pericyst 52 (58) 69  $\mu\text{m}$  x breath 47 (54) 59  $\mu\text{m}$ ; endocyst 43 (50) 59  $\mu\text{m}$  (14 specimens).

395 **Distribution.** The species was first reported from Troms and Hammerfest basins offshore north-west  
396 Norway (Costa 1985) and later described as *Ovoidinium?* sp. 1 from North-East Greenland (Nøhr-  
397 Hansen 1993). Recently *Ovoidinium?* sp. 1 has been recorded from the Kangerlussuaq Basin,  
398 southern East Greenland (Nøhr-Hansen 2012). The present study strongly indicate that the  
399 *Sindridinium borealis* gen. et sp. nov. and  *anaanae* gen. et sp. nov. are stratigraphical separated in  
400 on shore samples East Greenland and offshore Norwegian sidewall cores, whereas the forms co-  
401 occurring in offshore Norwegian cutting samples may represent caving. *Sindridinium borealis* gen. et  
402 sp. nov. seems to be older maybe precursor for *S. anaanae* gen. et sp. nov. *Sindridinium anaanae*

403 gen. et sp. nov. has its FO just above the last common occurrence of the *S. borealis* gen. et sp. nov. at  
 404 the east of Fosdalen section Hold with Hope (Figures 3, 5). *Sindridinium anaanae* gen. et sp. nov. was  
 405 not recorded in the Trunch Borehole in the five productive samples above the LO of *S. borealis* gen.  
 406 et sp. nov. Unfortunately, due to a conspicuous barren interval that extends from the upper middle  
 407 Cenomanian to the upper Turonian section, it is not known if the species exists in the area.  
 408 Additional studies are required to test the southern limit of *S. anaanae* gen. et sp. nov.

409 **Age.** A late Albian to ?Early Cenomanian age has been reported by Nøhr-Hansen (1993, 2012), The  
 410 present study indicates a FO in the Lower Cenomanian, the uppermost limit of the species range is  
 411 not believed to have been observed but most likely occurs in the Lower Cenomanian.

412 **Comparisons.** The closest described forms are *Ovoidinium implanum*, *O. scabrosum* and *O.*  
 413 *verrucosum* ssp. *ostium*, but these are normally represented by double-walled cysts with an apical  
 414 horn and apical pericoel, usually have a distinct cingulum and a wider archeopyle margin on which  
 415 the outline of the intercalary plates is better defined.

416

417 *Sindridinium? torulosa* comb. nov.

418 Plate 8, Figures 1–16

419 1973 *Canningia torulosa* Davey & Verdier, p. 180, 183, plate 1, figures 2, 5, 8.

420 1980 *Batiacasphaera torulosa* Dörhöfer & Davies p. 41.

421 1981 *Ovoidinium torulosum* Below, p. 124.

422 1981 *Canningia torulosa* Lentin & Williams p. 34.

423 1985 *Canningia torulosa* Lentin & Williams p. 44.

424 Below (1981) transferred (after his emendation of the genus *Canningia*) *Canningia torulosa* to

425 *Ovoidinium? torulosum*, whereas Lentin & Williams (1981, 1985) retained the species in *Canningia*.

1  
2  
3  
4  
5  
6  
7  
8  
9  
10  
11  
12  
13  
14  
15  
16  
17  
18  
19  
20  
21  
22  
23  
24  
25  
26  
27  
28  
29  
30  
31  
32  
33  
34  
35  
36  
37  
38  
39  
40  
41  
42  
43  
44  
45  
46  
47  
48  
49  
50  
51  
52  
53  
54  
55  
56  
57  
58  
59  
60

426 The species is herein questionably transferred to the new genus *Sindridinium* based on its apical  
427 archeopyle, circular or subcircular outline devoid of horns, a smooth to lightly granular wall with a  
428 numbers of irregularly distributed low tubercles, partly mirroring a tabulation.

429 *Sindridinium? torulosa* com. nov. is distinguished from *S. borealis* gen. et sp. nov. by its tubercles  
430 aligned at the cingulum, sulcal areas as well as intratabular and by having a wider slightly angulose  
431 archeopyle, and from *S. anaaae* gen. et sp. nov. by not being hypocavate.

432 *Sindridinium? torulosa* nov. comb. has a late Albian FO in Norwegian/Greenland Sea. Davey &  
433 Verdier (1973) gave a late Albian – Early Cenomanian age range for the species in France.

434 **Dimensions.**

435 Greenland specimens:

436 Cyts with operculum in situ: length 47 (57) 64 µm x breath 46 (55) 60 µm, width of archeopyle 25 (29)  
437 33 µm (12 specimens).

438 Cysts without operculum: Lenght 47 (53) 64 µm x breath 48 (54) 59 µm, width of archeopyle 28 (32)  
439 36 µm (5 specimens).

440 Norwegian specimens:

441 Cyts with operculum in situ: length 52 (54) 58,5 µm x breath 49 (52) 54 µm, width of archeopyle 31  
442 (34) 36 µm (3 specimens).

443 Cysts without operculum: Lenght 47 (49) 54 µm x breath 49 (52) 54 µm, width of archeopyle 21 (35)  
444 39 µm (5 specimens).

445

446 **4. Biostratigraphy**

447 The ages of the new species are based on their occurrence and co-occurrence with other  
448 stratigraphic marker species in the studied samples from onshore North-East Greenland, sidewall  
449 cores from Norwegian offshore wells (Plate 9, Figures 1–20) and from the  $\delta^{13}\text{C}$  calibrated Trunch

borehole, Norfolk UK In the sections from Tværdal and east of Fosdalen the dinocyst assemblage is dominated by *Rhombodella paucispina* together with common *Subtilisphaera kalaalliti*. *Sindridinium borealis* gen. et sp. nov. becomes common in the upper part of Tværdal section (Figure 2) and in the lower part of the east of Fosdalen section (Figure 3). *Sindridinium borealis* gen. et sp. nov. dominates the dinocyst assemblage in the same stratigraphic interval in the Barents Sea well 7102/7-2 (Figures 4, 5). *Sindridinium anaanae* gen. et sp. nov. first occurs in the upper part of the east of Fosdalen section and in the nearby Snertadal section, whereas this form is very rare in a narrow interval in the Barents Sea well.

The lowermost part of the Tværdal section is dated as late Albian based on the presence of *Odontochitina ancala* and LO of *Wigginsella grandstandica* (Figure 2, 5) and a side wall core (SWC) from the lowermost studied part of well 7102/7-2 is dated middle Albian based on the LO of *Leptodinium cancellatum*. This is followed by the FO of *Sindridinium? torulosa* comb. nov., *Epelidosphaeridia* sp. 1 Nøhr-Hansen 1993, *Palaeohystrichophora infusorioides*, *P. palaeoinfusa* and *Endoceratium dettmanniae* (Plate 9, Figures 1–6) in both the lower part of the Tværdal section and the Barents sea well 7102/7-2 (Figure 5) indicating a latest Albian age (Davey & Verdier 1973; Costa & Davey 1992; Fensome et al. 2009). The presence of the pollen *Rugubivesiculites multisaccus* (Plate 9, Figure 8) in the lower part of the Tværdal section (Figures 2, 5) may indicate that this Lower Cenomanian marker (Singh 1983; Zippi & Bajc 1990, Pedersen & Nøhr-Hansen 2014) could have a late Albian FO in North East Greenland.

The FO of *Sindridinium borealis* gen. et sp. nov. is dated as latest Albian based on the co-occurrence with the FO of *Epelidosphaeridia spinosa* and *Dinopterygium alatum* in the lower part of the Tværdal section (Figures 2, 5), whereas data from the Trunch borehole, Norfolk UK indicate an Early Cenomanian FO. *Sindridinium borealis* gen. et sp. nov. is rare in its lower range but become common to abundant in its upper range together with the FO of *Senoniasphaera* aff. *microreticulata* (Figure 4; Plate 9, Figures 9–14).

1  
2  
3  
4  
5  
6  
7  
8  
9  
10  
11  
12  
13  
14  
15  
16  
17  
18  
19  
20  
21  
22  
23  
24  
25  
26  
27  
28  
29  
30  
31  
32  
33  
34  
35  
36  
37  
38  
39  
40  
41  
42  
43  
44  
45  
46  
47  
48  
49  
50  
51  
52  
53  
54  
55  
56  
57  
58  
59  
60

475 The acme of *Sindridinium borealis* gen. et sp. nov is dated as Early Cenomanian (*Mantelliceras*  
476 *mantelli* - *dixonii* ammonite Zones, undivided) based on the co-occurrence with the ammonite  
477 *Schloenbachia varians* in the Tværdal section (Figures 2, 5). In the Trunch borehole, no ammonites  
478 were recovered from the core. The limits of the Lower Cenomanian ammonite zones are based in  
479 lithological correlations to ammonite calibrated sections, and by the distribution of *Inoceramus* and  
480 *Orbirhynchia* (see Wood et al., 1994). However, the acme of *S. borealis* gen. et sp. nov. clearly  
481 occurs in the Early Cenomanian, below the mid-Cenomanian  $\delta^{13}\text{C}$  isotope event I of Jarvis et al. (2006)  
482 and above the upper Albian Carstone. The  $\delta^{13}\text{C}$  calibration to the GTS 2016 (recalibrated here from  
483 Jarvis et al. 2006) suggests an age range of increased abundance of *S. borealis* gen. et sp. nov. of  
484 97.7–96.8 Ma, with the acme at 97.4 Ma, all within the *Mantelliceras dixonii* Zone.  
485 Within the upper range of *Sindridinium borealis* gen. et sp. nov. do *Epelidosphaeridia manifesta* sp.  
486 nov. have its FO followed by the FO of *Ovoidinium epelidosphaeroides* sp. nov.. The three species all  
487 seems to have their LO immediately before the FO of *Sindridinium anaanae* gen. et sp. nov.(Figure 5).  
488 The LO of *S. anaanae* gen. et sp. nov. has not been recorded onshore; however, the relative  
489 abundance of the species is very low at the top of east of Fosdalen section, which indicates a LO  
490 possibly latest Early Cenomanian or maybe early middle Cenomanian due to its occurrence after the  
491 LO of *Odontochitina ancala*, after the LO of *Xenascus* aff. *plotei* (Figure 5; Plate 9, Figures 15–20) and  
492 before the FO of *Trithyrodinium suspectum* and *Isabelidinium magnum* in the Barents Sea well  
493 7120/7-2 (Figures 4, 5).

494  
495 **5. Geographical distribution**  
496

497 The known geographical distribution of the new species described here has until now been  
498 restricted to the high boreal areas. The presence of *Sindridinium borealis* gen. et sp. nov. from the  
499 southern boreal locality at Norfolk extends the southern limit of at least that species. The inception  
500 of *S. borealis* gen. et sp. nov. in the late Albian to the north and the subsequent appearance in the

1  
2  
3 501 Early Cenomanian to the south in Norfolk, may be due to the migration of the species under Late  
4  
5 502 Cretaceous climatic cooling. The new species *Epelidosphaeridia manifesta* sp. nov., *Ovoidinium*  
6  
7 503 *epelidosphaeroides* sp. nov. and *Sindridinium anaanae* gen. et sp. nov. have, to the authors  
8  
9 504 knowledge, only been recorded from the northern boreal Norwegian/Greenland seas.  
10  
11 505  
12  
13 506 **Acknowledgements**  
14  
15 507 Norwegian Petroleum Directorate (NPD) in Stavanger are thanked for lending us palynological slides  
16  
17 508 from the wells 7120/7-2; 7120/8-2, 7119/12-1 and 7119/12-3.  
18  
19 509 We are also grateful for fruitful discussions with Stefan Piasecki of the Geological Museum, Natural  
20  
21 510 History Museum of Denmark, University of Copenhagen. We thank the two referees, .....and ....for  
22  
23 511 their very valuable comments and suggestions. We are grateful to A. Ryge and D. Samuelsen (GEUS)  
24  
25 512 who prepared the samples and to J. Halskov (GEUS) who produced the figures. The paper is  
26  
27 513 published with permission of the Geological Survey of Denmark and Greenland.  
28  
29  
30  
31  
32  
33  
34  
35  
36  
37  
38  
39  
40  
41  
42  
43  
44  
45  
46  
47  
48  
49  
50  
51  
52  
53  
54  
55  
56  
57  
58  
59  
60

1  
2  
3  
4  
5  
6  
7  
8  
9  
10  
11  
12  
13  
14  
15  
16  
17  
18  
19  
20  
21  
22  
23  
24  
25  
26  
27  
28  
29  
30  
31  
32  
33  
34  
35  
36  
37  
38  
39  
40  
41  
42  
43  
44  
45  
46  
47  
48  
49  
50  
51  
52  
53  
54  
55  
56  
57  
58  
59  
60

**References.**

Below R. 1981. Dinoflagellaten-Zysten aus dem oberen Hauterive bis unteren Cenoman Süd-West-Marokkos. *Palaeontographica*, Abteilung B 176:1–145.

Cookson IC, Eisenack A. 1960. Microplankton from Australian Cretaceous sediments. *Micropaleontology* 6:1–18.

Cookson IC, Eisenack A. 1961. Upper Cretaceous microplankton from the Belfast No. 4 Bore, south-western Victoria. *Proceedings of the Royal Society of Victoria* 74:69–76.

Cookson IC, Hughes NF. 1964. Microplankton from the Cambridge Greensand (mid-Cretaceous). *Palaeontology* 7:37–59.

Costa LI. 1985. The *Ascodinium* plexus in the latest Albian to earliest Cenomanian offshore Arctic Norway. In: Third International Conference on Modern and Fossil Dinoflagellates, Egham, August, 1985, Abstracts, unnumbered page.

Costa LI, Davey RJ. 1992. Dinoflagellate cysts of the Cretaceous System. In Powell, A J, editor. A Stratigraphic Index of Dinoflagellate Cyst, 99–154, British Micropalaeontological Society Series, London: Chapman & Hall.

Davey RJ. 1969. Non-calcareous microplankton from the Cenomanian of England, northern France and North America, part I. *British Museum (Natural History) Geology, Bulletin* 17:103–180.

Davey RJ. 1970. Non-calcareous microplankton from the Cenomanian of England, northern France and North America, part II. *British Museum (Natural History) Geology, Bulletin* 18:333–397.

Davey RJ, Verdier JP. 1973. An investigation of microplankton assemblages from latest Albian (Vraconian) sediments. *Revista Espanola de Micropaleontologia* 5:173–212.

Fensome RA, Williams GL, MacRae RA. 2009. Late Cretaceous and Cenozoic fossil dinoflagellates and other palynomorphs from the Scotian Margin, offshore Eastern Canada. *J. Syst. Palaeontol.* 7:1–79.



- 1  
2  
3 537 Fensome RA, Taylor FJR, Norris G, Sarjeant WAS, Wharton DI, Williams GL. 1993. A classification of  
4  
5 538 fossil and living dinoflagellates. Micropaleontology Press Special Paper 7:351 p.  
6  
7  
8 539 Helenes J. 1983. Evaluation of Jurassic-Cretaceous dinoflagellates in the Ascodinium-Ovoidinium  
9  
10 540 complex. Micropaleontology 29:255–266.  
11  
12  
13 541 Jarvis I, Gale A S, Jenkyns HC, Pearce MA. 2006. Secular variation in Late Cretaceous carbon isotopes  
14  
15 542 and sea - level change: Evidence from a new  $\delta^{13}\text{C}$  carbonate reference curve for the Cenomanian –  
16  
17 543 Campanian (99.6 – 70.6 Ma), Geol. Mag. 143:561–608, doi:10.1017/S0016756806002421.  
18  
19  
20 544 Lentin JK, Williams GL. 1976. A monograph of fossil peridinioid dinoflagellate cysts. Bedford Institute  
21  
22 545 of Oceanography, Report Series BI-R-75-16:237 p.  
23  
24  
25 546 Lentin JK, Williams GL. 1981. Fossil dinoflagellates: index to genera and species, 1981 edition.  
26  
27 547 Bedford Institute of Oceanography, Report Series BI-R-81-12:345 p.  
28  
29  
30 548 Lentin JK, Williams GL. 1985. Fossil dinoflagellates: index to genera and species, 1985 edition.  
31  
32 549 Canadian Technical Report of Hydrography and Ocean Sciences 60:451 p.  
33  
34  
35 550 Lentin JK, Williams GL. 1989. Fossil dinoflagellates: index to genera and species, 1989 edition.  
36  
37 551 American Association of Stratigraphic Palynologists, Contributions Series 20:473 p.  
38  
39  
40 552 Morgan R. 1980. Palynostratigraphy of the Australian early and middle Cretaceous. Geological  
41  
42 553 Survey of New South Wales, Palaeontology Memoir 18:1–153.  
43  
44  
45 554 Nøhr-Hansen H. 1993. Dinoflagellate cyst stratigraphy of the Barremian to Albian Lower Cretaceous,  
46  
47 555 north-east Greenland. Bulletin Grønlands Geologiske Undersøgelse 166:171 p.  
48  
49 556  
50  
51 557 Nøhr-Hansen H. 2012. Palynostratigraphy of the Cretaceous – lower Palaeogene sedimentary  
52  
53 558 succession in the Kangerlussuaq Basin, southern East Greenland. Review of Palaeobotany and  
54  
55 559 Palynology 178:59–90.  
56  
57  
58  
59  
60

1  
2  
3 560  
4  
5 561 Ogg JG, Ogg GM, Gradstein FM, 2016. A Concise Geologic Time Scale  
6  
7 562 Elsevier, 234 p. <http://dx.doi.org/10.1016/B978-0-444-59467-9.00001-7>  
8  
9 563  
10  
11 564 Pedersen GK, Nøhr-Hansen H. 2014. Sedimentary successions and palynoevent stratigraphy from the  
12  
13 565 non-marine Lower Cretaceous to the marine Upper Cretaceous of the Nuussuaq Basin, West  
14  
15 566 Greenland. Bulletin of Canadian Petroleum Geology 62:216–244.  
16  
17 567  
18  
19  
20 568 Radmacher W, Tyszka J, Mangerud G, Pearce MA. 2014. Dinoflagellate cyst biostratigraphy of the  
21  
22 569 Upper Albian to Lower Maastrichtian in the southwestern Barents Sea. Marine and Petroleum  
23  
24 570 Geology 57:109–121.  
25  
26  
27 571 Singh C. 1983. Cenomanian microfloras of the Peace River area, northwestern Alberta: Alberta  
28  
29 572 Research Council, Bulletin 44:322 p.  
30  
31  
32 573 Stover LE, Evitt WR. 1978. Analyses of pre-Pleistocene organic-walled dinoflagellates. Stanford  
33  
34 574 University Publications, Geological Sciences 15:300 p.  
35  
36  
37 575 Wood CJ, Morter AA, Gallois RW. 1994. Appendix 1. Upper Cretaceous stratigraphy of the Trunch  
38  
39 576 borehole. TG23SE8. In: (Arthurton RS, Booth SJ, Morigi AN, Abbott MAW, Wood CJ, eds) *Geology of*  
40  
41 577 *the Country around Great Yarmouth*. Memoir for 1:50,000 Sheet 162 (England and Wales) with an  
42  
43 578 Appendix on the Truch Borehole by Wood and Morter. H.M.S.O., London, 105–110 pp.  
44  
45  
46 579 Zippi PA, Bajc AF. 1990. Note: Recognition of a Cretaceous Outlier in Northwestern Ontario. Journal:  
47  
48 580 Canadian Journal of Earth Sciences 27:306–311.  
49  
50  
51  
52  
53  
54  
55  
56  
57  
58  
59  
60

581 **Figure Captions.**

582 Figure 1. Location map of the studied sections.

583 Figure 2. Range-chart of selected dinoflagellate cysts from the more than 400 m thick dark grey  
584 mudstone succession at Tværdal, Geographical Society Ø, North-East Greenland; (section 30 of  
585 Nøhr-Hansen 1993 and GEUS, PAL-3/2011; 72°58'N; 23°02'W).

586 Figure 3. Range-chart of selected dinoflagellate cysts from the more than 500 m thick dark grey  
587 mudstone succession east of Fosdalen, Hold with Hope, North-East Greenland (GEUS section,  
588 HNH081410-01; 73°52'N; 20°43'W).

589 Figure 4. Range-chart of selected dinoflagellate cysts from the Albian to Turonian interval (depth  
590 1000–1500m) in well 7120/7-2. Snøhvit, Barents Sea, offshore Norway (71° 19' 11.49" N; 20° 19'  
591 44.31" W).

592 Figure 5. Correlation of the Tværdal and east of Fosdalen sections with the well 7120/7-2, based on  
593 events of old and new marker species.

594 Figure 6. The stratigraphic distribution of *Sindridinium borealis* gen. et sp. nov. in the Trunch  
595 borehole (Norfolk, southeast UK, 52°51'34" N; 01°24'19" E) and its correlation to the  $\delta^{13}\text{C}$  isotope  
596 curve of Jarvis et al. (2006). As no ammonites were recovered from the Lower Cenomanian section,  
597 the limits of the ammonite zones are based in lithological correlations to ammonite calibrated  
598 sections, and by the distribution of *Inoceramus* and *Orbirhynchia* (see Wood et al., 1994). However,  
599 the acme of *S. borealis* gen. et sp. nov. clearly occurs in the Early Cenomanian, below the mid-  
600 Cenomanian  $\delta^{13}\text{C}$  isotope event I of Jarvis et al. (2006) and above the late Albian Carstone. The  $\delta^{13}\text{C}$   
601 calibration to the GTS 2016 (recalibrated here from Jarvis et al. 2006) suggests an age range of  
602 increased abundance of *S. borealis* gen. et sp. nov. of 97.7–96.8 Ma, with the acme at 97.4 Ma, all  
603 within the *Mantelliceras dixonii* Zone.

1  
2  
3  
4  
5  
6  
7  
8  
9  
10  
11  
12  
13  
14  
15  
16  
17  
18  
19  
20  
21  
22  
23  
24  
25  
26  
27  
28  
29  
30  
31  
32  
33  
34  
35  
36  
37  
38  
39  
40  
41  
42  
43  
44  
45  
46  
47  
48  
49  
50  
51  
52  
53  
54  
55  
56  
57  
58  
59  
60

604  Figure 1. Figures 1–16 *Epelidosphaeridia* sp. 1 Nøhr.-Hansen 1993. 

605 Sample number; England Finder coordinates; picture reference number and locality are listed for the

606 specimens illustrated.

607 Figure 1. 518602-7, R45-1, Section JHOV-2/2009, Snertadal, north Hold with Hope, North-East

608 Greenland.

609 Figure 2. 487645-3, W39-3, 1224, Section HNH081410-4, east of Fosdalen, north Hold with Hope,

610 North-East Greenland.

611 Figure 3. 487648-2, S49-1, 1226, Section HNH081410-4, east of Fosdalen, north Hold with Hope,

612 North-East Greenland.

613  Figures 4–6 *Epelidosphaeridia spinosa*

614 Figure 4. 1251m DC, N25-4, 1140, Well 7120/7-2 Offshore Norway.

615 Figure 5. 1185m SWC, G47-2, 1162, Well 7120/7-2 Offshore Norway.

616 Figure 6. 1269m DC, G30-1, 1127, Well 7120/7-2 Offshore Norway.

617 Figures 7–16 *Epelidosphaeridia manifesta* gen. et sp. nov.

618 Figure 7. Holotype 487643-3, F52-4, 1206, Section HNH081410-4, east of Fosdalen, north Hold with

619 Hope, North-East Greenland.

620 Figure 8. 487645-3, N34-4, 1223, Section HNH081410-4, east of Fosdalen, north Hold with Hope,

621 North-East Greenland.

622 Figure 9. 1420-30m DC b, P30-1, 1186, Well 7119/12-1 Offshore Norway.

623 Figure 10. 1160m DC, E39-4, 1163, Well 7120/7-2 Offshore Norway.

624 Figure 11. 522074-4 U34-1, 1461, Section PAL-3/2011, Tværdal, Geographical Society Ø, North-East

625 Greenland.

- 1  
2  
3 626 Figure 12. 487643-3, U42-3, 1207, Section HNH081410-4, east of Fosdalen, north Hold with Hope,  
4  
5 627 North-East Greenland.  
6  
7  
8 628 Figure 13. 1302–05m DC, H43, 1119, Well 7120/7-2 offshore Norway.  
9  
10  
11 629 Figure 14. 1150m DC00 a, G43-1, 1174, Well 7120/7-2 offshore Norway.  
12  
13 630 Figure 15. 1150m DC00 a, S34-4, 1170, Well 7120/7-2 offshore Norway.  
14  
15  
16 631 Figure 16. 1302–05m DC, J40-2, 1120, Well 7120/7-2 offshore Norway.  
17  
18  
19  
20  
21  
22  
23  
24  
25  
26  
27  
28  
29  
30  
31  
32  
33  
34  
35  
36  
37  
38  
39  
40  
41  
42  
43  
44  
45  
46  
47  
48  
49  
50  
51  
52  
53  
54  
55  
56  
57  
58  
59  
60

1  
2  
3  
4  
5  
6  
7  
8  
9  
10  
11  
12  
13  
14  
15  
16  
17  
18  
19  
20  
21  
22  
23  
24  
25  
26  
27  
28  
29  
30  
31  
32  
33  
34  
35  
36  
37  
38  
39  
40  
41  
42  
43  
44  
45  
46  
47  
48  
49  
50  
51  
52  
53  
54  
55  
56  
57  
58  
59  
60

- 632 Plate 2. Figures 1–16. *Ovoidinium epelidosphaeroides* sp. nov.
- 633 Sample number; England Finder coordinates; picture reference number and locality are listed for the
- 634 specimens illustrated.
- 635 Figure 1. Holotype, 522081-4, Z21-2, 1502, Section PAL-3/2011, Tværdal, Geographical Society Ø,
- 636 North-East Greenland.
- 637 Figure 2. 422081-4, K35-2, 1505, Section PAL-3/2011, Tværdal Geographical Society Ø, North-East
- 638 Greenland.
- 639 Figure 3. 422082-3, Y27-1, 1507, Section PAL-3/2011, Tværdal Geographical Society Ø, North-East
- 640 Greenland.
- 641 Figure 4. 422082-4, O42-3, 1512, Section PAL-3/2011, Tværdal Geographical Society Ø, North-East
- 642 Greenland.
- 643 Figure 5. 487634-3, S16-4, 1460, Section HNH081410-4, east of Fosdalen, north Hold with Hope,
- 644 North-East Greenland.
- 645 Figure 6. 487633-3, M45-3, 1200, Section HNH081410-4, east of Fosdalen, north Hold with Hope,
- 646 North-East Greenland.
- 647 Figure 7. 487633-4, S29-2, 1202, Section HNH081410-4, east of Fosdalen, north Hold with Hope,
- 648 North-East Greenland.
- 649 Figure 8. 422082-4, O42-3, 1510, Section PAL-3/2011, Tværdal Geographical Society Ø, North-East
- 650 Greenland.
- 651 Figure 9. 1169m DC00 a, G34-2, 1169, Well 7120/7-2 offshore Norway.
- 652
- 653 Figure 10. 1010m DC00 b, S46-1, 1197, Well 7120/8-2 offshore Norway.
- 654
- 655
- 656 Figure 11. 1150m DC00 a, G55-3, 1178, Well 7120/7-2 offshore Norway.
- 657
- 658
- 659
- 660

- 1
- 2
- 3 654 Figure 12. 1150m DC00 a, F49-3, 1176, Well 7120/7-2 offshore Norway.
- 4
- 5
- 6 655 Figure 13. 422082-4, R42-4, 1513, Section PAL-3/2011, Tværdal Geographical Society Ø, North-East
- 7
- 8 656 Greenland.
- 9
- 10
- 11 657 Figure 14. 487637-3, L46-3, Section HNH081410-4, east of Fosdalen, north Hold with Hope, North-
- 12
- 13 658 East Greenland.
- 14
- 15
- 16 659 Figure 15. 1150m 1218 SWC, H29-2, 1166, Well 7120/7-2 offshore Norway.
- 17
- 18
- 19 660 Figure 16. 422084-5, K33-3, 1516, Section PAL-3 2011, Tværdal Geographical Society Ø, North-East
- 20
- 21 661 Greenland.
- 22
- 23
- 24
- 25
- 26
- 27
- 28
- 29
- 30
- 31
- 32
- 33
- 34
- 35
- 36
- 37
- 38
- 39
- 40
- 41
- 42
- 43
- 44
- 45
- 46
- 47
- 48
- 49
- 50
- 51
- 52
- 53
- 54
- 55
- 56
- 57
- 58
- 59
- 60

1  
2  
3  
4  
5  
6  
7  
8  
9  
10  
11  
12  
13  
14  
15  
16  
17  
18  
19  
20  
21  
22  
23  
24  
25  
26  
27  
28  
29  
30  
31  
32  
33  
34  
35  
36  
37  
38  
39  
40  
41  
42  
43  
44  
45  
46  
47  
48  
49  
50  
51  
52  
53  
54  
55  
56  
57  
58  
59  
60

662 Plate 3. Figures 1–16. *Sindridinium borealis* gen. et sp. nov.

663 Sample number; England Finder coordinates; picture reference number and locality are listed for the

664 specimens illustrated.

665 Figure 1. Holotype, 522076-4 U53-1, 1463, Section PAL-3/2011, Tværdal, Geographical Society Ø,

666 North-East Greenland.

667 Figure 2. 487643-3, J45-4, 1212, Section HNH081410-4, east of Fosdalen, north Hold with Hope,

668 North-East Greenland.

669 Figure 3. 487643-4, M18-2, 1455, Section HNH081410-4, east of Fosdalen, north Hold with Hope,

670 North-East Greenland.

671 Figure 4. 487643-4, T41-3, 1456, Section HNH081410-4, east of Fosdalen, north Hold with Hope,

672 North-East Greenland.

673 Figure 5. 518602-7, 41,73-11,45, Section JHOV-2/2009, Snertadal, north Hold with Hope, North-East

674 Greenland.

675 Figure 6. 487648-3, V35-4, 1227, Section HNH081410-4, east of Fosdalen, north Hold with Hope,

676 North-East Greenland.

677 Figure 7. 487645-4, F33-3, 1458, Section HNH081410-4, east of Fosdalen, north Hold with Hope,

678 North-East Greenland.

679 Figure 8. 487645-4, O31-3, 1457, Section HNH081410-4, east of Fosdalen, north Hold with Hope,

680 North-East Greenland.

681 Figure 9. 522076-4 W53-4, 1462, Section PAL-/ 2011, Tværdal, Geographical Society Ø, North-East

682 Greenland.

683 Figure 10. 1420–30m DC b, E32-3, 1187, Well 7119/12-1 offshore Norway.



- 1  
2  
3 684 Figure 11. 1272–75m, P35-1, 1122, Well 7120/7-2 offshore Norway.  
4  
5  
6 685 Figure 12. 1420–30m DC b, R33-4, 1190, Well 7119/12-1 offshore Norway.  
7  
8  
9 686 Figure 13. 1152,5m SWC, C44-1, 1161, Well 7120/7-2 offshore Norway.  
10  
11 687 Figure 14. 1257–60m, E42-2, 1137, Well 7120/7-2 offshore Norway.  
12  
13  
14 688 Figure 15. 1420–30m DC b, Q33-1, 1188, Well 7119/12-1 offshore Norway.  
15  
16  
17 689 Figure 16. 1420–30m DC b, V27-1, 1185, Well 7119/12-1 offshore Norway.  
18  
19  
20  
21  
22  
23  
24  
25  
26  
27  
28  
29  
30  
31  
32  
33  
34  
35  
36  
37  
38  
39  
40  
41  
42  
43  
44  
45  
46  
47  
48  
49  
50  
51  
52  
53  
54  
55  
56  
57  
58  
59  
60

1  
2  
3  
4  
5  
6  
7  
8  
9  
10  
11  
12  
13  
14  
15  
16  
17  
18  
19  
20  
21  
22  
23  
24  
25  
26  
27  
28  
29  
30  
31  
32  
33  
34  
35  
36  
37  
38  
39  
40  
41  
42  
43  
44  
45  
46  
47  
48  
49  
50  
51  
52  
53  
54  
55  
56  
57  
58  
59  
60

690 Plate 4. Figures 1–12. *Sindridinium borealis* gen. et sp. nov. from the Trunch borehole, Norfolk,  
691 southeast UK. The scale bar represents 10  $\mu$ m.  
692 Figures 1–6. 507.8–507.9 m, showing a specimen with an attached operculum, and an omphalos in  
693 the internal cavity.  
694 Figure 7. 507.8–507.9 m, showing a more elongate specimen, presumably compressed.  
695 Figure 8. 507.8–507.9 m, showing a specimen with a detached operculum. The arrow points to a  
696 conspicuous v-shaped notch that appears on many specimens.  
697 Figures 9–10, 507.8–507.9 m.  
698 Figure 11. 507.8–507.9 m, same specimen as Figure 10 but illustrated with a possible tabulation  
699 pattern.  
700 Figure 12. 507.8–507.9 m, showing a specimen with a detached operculum. The arrow points to a  
701 conspicuous v-shaped notch that appears on many of the specimens from the Trunch borehole.

- 1  
2  
3 702 Plate 5. Figures 1–6, 8–9. *Sindridinium borealis* gen. et sp. nov. SEM pictures. Scale bars 10 µm.  
4  
5  
6 703 Figures 1–6, 8–9, 522082, Section PAL-3/2011, Tværdal, Geographical Society Ø, North-East  
7  
8 704 Greenland.  
9  
10  
11 705 Figure 7, 522079, Section PAL-3/2011, Tværdal, Geographical Society Ø, North-East Greenland. Scale  
12  
13 706 bar 10 µm.  
14  
15  
16  
17  
18  
19  
20  
21  
22  
23  
24  
25  
26  
27  
28  
29  
30  
31  
32  
33  
34  
35  
36  
37  
38  
39  
40  
41  
42  
43  
44  
45  
46  
47  
48  
49  
50  
51  
52  
53  
54  
55  
56  
57  
58  
59  
60

1  
2  
3  
4  
5  
6  
7  
8  
9  
10  
11  
12  
13  
14  
15  
16  
17  
18  
19  
20  
21  
22  
23  
24  
25  
26  
27  
28  
29  
30  
31  
32  
33  
34  
35  
36  
37  
38  
39  
40  
41  
42  
43  
44  
45  
46  
47  
48  
49  
50  
51  
52  
53  
54  
55  
56  
57  
58  
59  
60

707 Plate 6. Figures 1–16. *Sindridinium anaanae* gen. et sp. nov.

708 Sample number; England Finder coordinates; picture reference number and locality are listed for the

709 specimens illustrated.

710 Figure 1. Holotype, 518602-7, M32-1,Section JHOV-2/2009, Snertadal, north Hold with Hope, North-

711 East Greenland.

712 Figure 2. , 518604-8, D47, 1233,Section JHOV-2/2009, Snertadal, north Hold with Hope, North-East

713 Greenland.

714 Figure 3. 487631-3, O28-2, 1464, Section HNH081410-4, east of Fosdalen, north Hold with Hope,

715 North-East Greenland.

716 Figure 4. 487631-3, N24-4, 1471, Section HNH081410-4, east of Fosdalen, north Hold with Hope,

717 North-East Greenland.

718 Figure 5. 518604-9, V31-2, 1235,Section JHOV-2/2009, Snertadal, north Hold with Hope, North-East

719 Greenland.

720 Figure 6. 487631-3, M50-1, 1476, Section HNH081410-4, east of Fosdalen, north Hold with Hope,

721 North-East Greenland.

722 Figure 7. 487631-3, M51-1, 1467, Section HNH081410-4, east of Fosdalen, north Hold with Hope,

723 North-East Greenland.

724 Figure 8. 487631-3, Y22-2, 1469, Section HNH081410-4, east of Fosdalen, north Hold with Hope,

725 North-East Greenland.

726 Figure 9. 487631-3, X41-1, 1474, Section HNH081410-4, east of Fosdalen, north Hold with Hope,

727 North-East Greenland.

728 Figure 10. 487631-4, H30-3, 1898, Section HNH081410-4, east of Fosdalen, north Hold with Hope,

729 North-East Greenland.

- 1  
2  
3 730 Figure 11. 487631-3, M52-1, 1478, Section HNH081410-4, east of Fosdalen, north Hold with Hope,  
4  
5 731 North-East Greenland.  
6  
7  
8 732 Figure 12. 518610-8, L43-3, 1532, Section JHOV-2/2009, Snertadal, north Hold with Hope, North-East  
9  
10 733 Greenland.  
11  
12  
13 734 Figure 13. 1160m DC, P30-4, 1165, Well 7120/7-2 offshore Norway.  
14  
15  
16 735 Figure 14. 1010m DC00 b, H41-2, 1199, Well 7120/8-2 offshore Norway.  
17  
18  
19 736 Figure 15. 1010m DC00 b, D33-3, 1196, Well 7120/8-2 offshore Norway.  
20  
21 737 Figure 16. 1010m DC00 b, G29-3, 1195, Well 7120/8-2 offshore Norway.  
22  
23  
24  
25  
26  
27  
28  
29  
30  
31  
32  
33  
34  
35  
36  
37  
38  
39  
40  
41  
42  
43  
44  
45  
46  
47  
48  
49  
50  
51  
52  
53  
54  
55  
56  
57  
58  
59  
60

1  
2  
3  
4  
5  
6  
7  
8  
9  
10  
11  
12  
13  
14  
15  
16  
17  
18  
19  
20  
21  
22  
23  
24  
25  
26  
27  
28  
29  
30  
31  
32  
33  
34  
35  
36  
37  
38  
39  
40  
41  
42  
43  
44  
45  
46  
47  
48  
49  
50  
51  
52  
53  
54  
55  
56  
57  
58  
59  
60

738 Plate 7. Figures 1–9. *Sindridinium anaanae* gen. et sp. nov. SEM pictures. 48763, Section  
739 HNH081410-4, east of Fosdalen, north Hold with Hope, North-East Greenland. Scale bars 10 µm.  
740 Figures 10–12. *Ovoidinium epelidosphaeroides* sp. nov. SEM pictures, 522082, Section PAL-3/2011,  
741 Tværdal, Geographical Society Ø, North-East Greenland. Scale bars 10 µm.

- 1  
2  
3 742 Plate 8. Figures 1–16. *Sindridinium? torulosa* comb. nov.  
4  
5  
6 743 Sample number; England Finder coordinates; picture reference number and locality are listed for the  
7  
8 744 specimens illustrated.  
9  
10  
11 745 Figure 1. 324608-8, W21-4, 1560, Section SP 1986, Tværdal, Geographical Society Ø, North-East  
12  
13 746 Greenland.  
14  
15  
16 747 Figure 2. 324611-4, O48-4, 1573, Section SP 1986, Tværdal, Geographical Society Ø, North-East  
17  
18 748 Greenland.  
19  
20  
21 749 Figure 3. 324611-7, Y19-3, 1571, Section SP 1986, Tværdal, Geographical Society Ø, North-East  
22  
23 750 Greenland.  
24  
25  
26 751 Figure 4. 522059-5, U26-4, 1568, Section SP 1986, Tværdal, Geographical Society Ø, North-East  
27  
28 752 Greenland.  
29  
30  
31 753 Figure 5. 324611-7, P48-1, 1570, Section SP 1986, Tværdal, Geographical Society Ø, North-East  
32  
33 754 Greenland.  
34  
35  
36 755 Figure 6. 324608-7, N43-2, 1558, Section SP 1986, Tværdal, Geographical Society Ø, North-East  
37  
38 756 Greenland.  
39  
40  
41 757 Figure 7. 324610-4, O24-2, 1564, Section SP 1986, Tværdal, Geographical Society Ø, North-East  
42  
43 758 Greenland.  
44  
45  
46 759 Figure 8. 324612-4, N54-1, 1575, Section SP 1986, Tværdal, Geographical Society Ø, North-East  
47  
48 760 Greenland.  
49  
50  
51 761 Figure 9. 1247,5m SWC, L47-3, 1152, Well 7120/7-2 offshore Norway.  
52  
53  
54 762 Figure 10. 1247,5m SWC, D42-1, 1146, Well 7120/7-2 offshore Norway.  
55  
56  
57 763 Figure 11. 1247,5m SWC, K47-1, 1151, Well 7120/7-2 offshore Norway.  
58  
59  
60

1  
2  
3  
4  
5  
6  
7  
8  
9  
10  
11  
12  
13  
14  
15  
16  
17  
18  
19  
20  
21  
22  
23  
24  
25  
26  
27  
28  
29  
30  
31  
32  
33  
34  
35  
36  
37  
38  
39  
40  
41  
42  
43  
44  
45  
46  
47  
48  
49  
50  
51  
52  
53  
54  
55  
56  
57  
58  
59  
60

- 764     Figure 12. 1247,5m SWC, L44-2, 1149, Well 7120/7-2 offshore Norway.
- 765     Figure 13. 1247,5m SWC, G44-3, 1147, Well 7120/7-2 offshore Norway.
- 766     Figure 14. 1247,5m SWC, P46-2, 1153, Well 7120/7-2 offshore Norway.
- 767     Figure 15. 1247,5m SWC, P42-1, 1145, Well 7120/7-2 offshore Norway.
- 768     Figure 16. 1247,5m SWC, E45-3, 1150, Well 7120/7-2 offshore Norway.



- 1  
2  
3 769 Plate 9. Scale bar 20µm for Figures 1–14 is placed at Figure 14.  
4  
5  
6 770 Sample number; England Finder coordinates; picture reference number and locality are listed for the  
7  
8 771 specimens illustrated.  
9  
10  
11 772 Figures 1–6. *Endoceratium dettmanniae*.  
12  
13  
14 773 Figure 1. 1251m DC b, U35-2, 1144, Well 7120/7-2 Offshore Norway.  
15  
16  
17 774 Figure 2. 1260m DC b, K42-3, 1136, Well 7120/7-2 Offshore Norway.  
18  
19  
20 775 Figure 3. 1260m DC b, B35-3, 1135, Well 7120/7-2 Offshore Norway.  
21  
22  
23 776 Figure 4. 487620-3, T17-4, 1221, Section HNH081410-4, east of Fosdalen, north Hold with Hope,  
24  
25 777 North-East Greenland.  
26  
27  
28 778 Figure 5. 522085-4, X45-3, 1519, Section PAL 3-2011, Tværdal, Geographical Society Ø, North-East  
29  
30 779 Greenland.  
31  
32  
33 780 Figure 6. 1260m DC a, S38-3, 1133, Well 7120/7-2 offshore Norway.  
34  
35  
36 781 Figure 7. *Nyktericysta arachnion*, 487627-4, V24-2, 1557, Section HNH081410-4, east of Fosdalen,  
37  
38 782 north Hold with Hope, North-East Greenland.  
39  
40  
41 783 Figure 8. *Rugubivesiculites multisaccus* 52266-4, 1483, Section PAL 3-2011, Tværdal, Geographical  
42  
43 784 Society Ø, North-East Greenland.  
44  
45  
46 785 Figures 9–14. *Senoniasphaera* aff. *microreticulata*.  
47  
48  
49 786 Figure 9. 1420–30m DC b, D49-3, 1194, Well 7119/12-1 offshore Norway.  
50  
51  
52 787 Figure 10. 1272–75m, R47-4, 1124, Well 7120/7-2 offshore Norway.  
53  
54  
55 788 Figure 11. 487633-3, J49-1, 1205, Section HNH081410-4, east of Fosdalen, north Hold with Hope,  
56  
57 789 North-East Greenland.  
58  
59  
60

1  
2  
3  
4  
5  
6  
7  
8  
9  
10  
11  
12  
13  
14  
15  
16  
17  
18  
19  
20  
21  
22  
23  
24  
25  
26  
27  
28  
29  
30  
31  
32  
33  
34  
35  
36  
37  
38  
39  
40  
41  
42  
43  
44  
45  
46  
47  
48  
49  
50  
51  
52  
53  
54  
55  
56  
57  
58  
59  
60

790 Figure 12. 487633-3, 1203, Section HNH081410-4, east of Fosdalen, north Hold with Hope, North-  
791 East Greenland.  
792 Figure 13. 1218m SWC, T42-2, 1159, Well 7120/7-2 offshore Norway.  
793 Figure 14. 1218m SWC, W40-2, 1155, Well 7120/7-2 offshore Norway.  
794 Figures 15–18. *Xenascus* aff. *plotei* Individual scale bars 20 µm.  
795 Figure 15. 487623-4, W43-1, 1554, Section HNH081410-4, east of Fosdalen, north Hold with Hope,  
796 North-East Greenland.  
797 Figure 16. 487620-3, B27-4, 1551, Section HNH081410-4, east of Fosdalen, north Hold with Hope,  
798 North-East Greenland.  
799 Figure 17. 487625-3, O42-3, 1556, Section HNH081410-4, east of Fosdalen, north Hold with Hope,  
800 North-East Greenland.  
801 Figure 18. 518602-8, V43-2, 1544, Section JHOV-2/2009, Snertadal, north Hold with Hope, North-  
802 East Greenland.

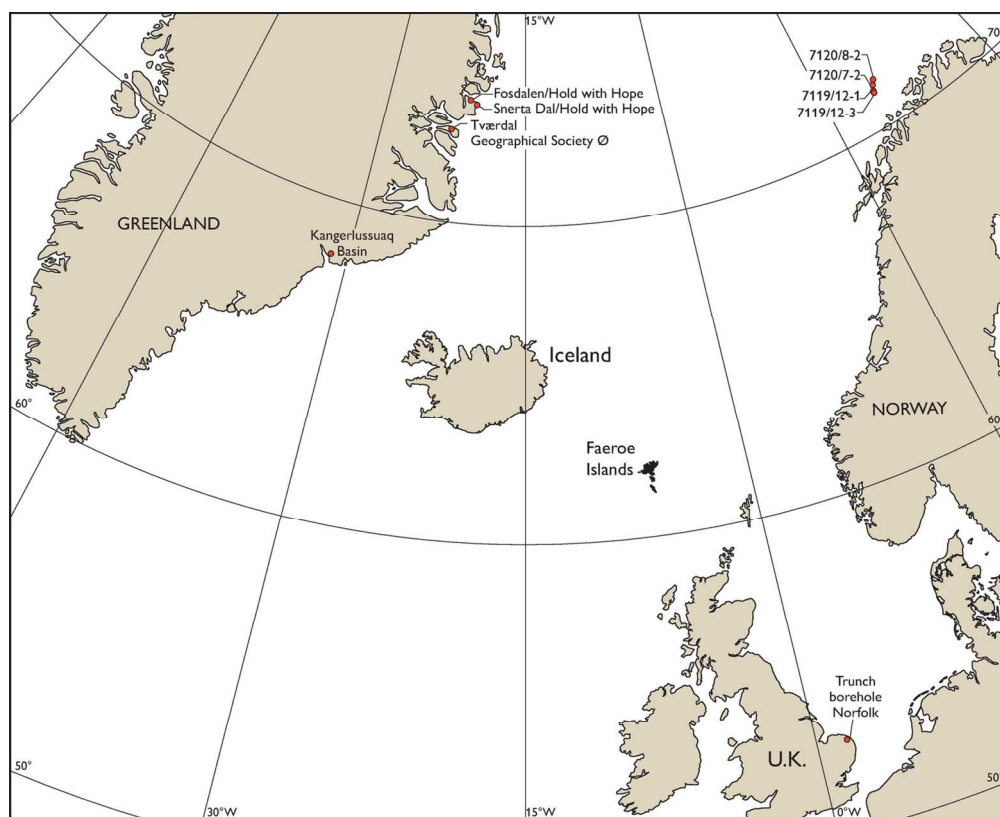

Figure 1. Location map of the studied sections.

129x104mm (300 x 300 DPI)

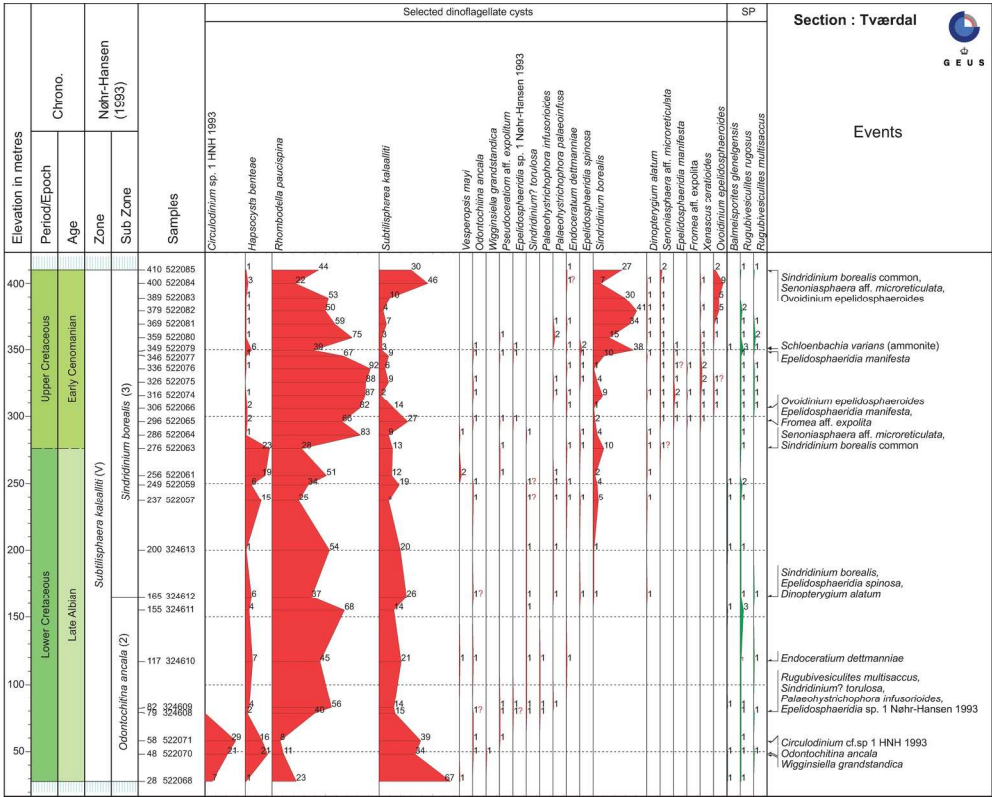

Figure 2. Range-chart of selected dinoflagellate cysts from the more than 400 m thick dark grey mudstone succession at Tværdaal, Geographical Society Ø, North-East Greenland; (section 30 of Nøhr-Hansen 1993 and GEUS, PAL-3/2011; 72°58'N; 23°02'W).

190x150mm (300 x 300 DPI)

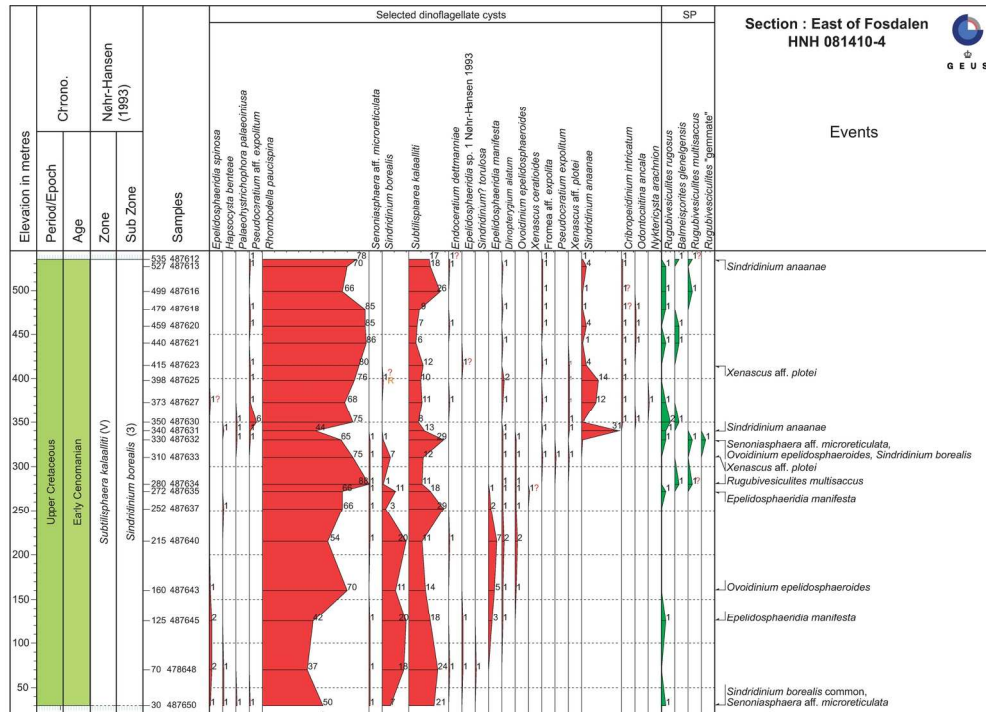

Figure 3. Range-chart of selected dinoflagellate cysts from the more than 500 m thick dark grey mudstone succession east of Fosdalen, Hold with Hope, North-East Greenland (GEUS section, HNH081410-01; 73°52'N; 20°43'W).

170x120mm (300 x 300 DPI)

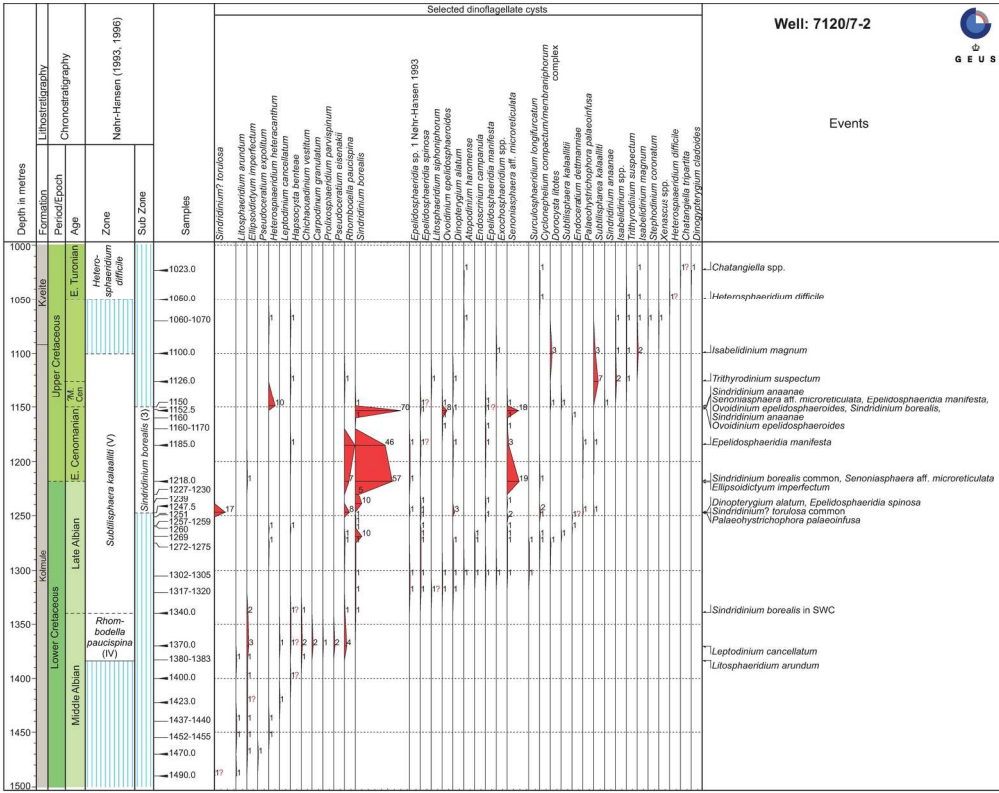

Figure 4. Range-chart of selected dinoflagellate cysts from the Albian to Turonian interval (depth 1000–1500m) in well 7120/7-2. Snøhvit, Barents Sea, offshore Norway (71° 19' 11.49" N; 20° 19' 44.31" W).

190x149mm (300 x 300 DPI)



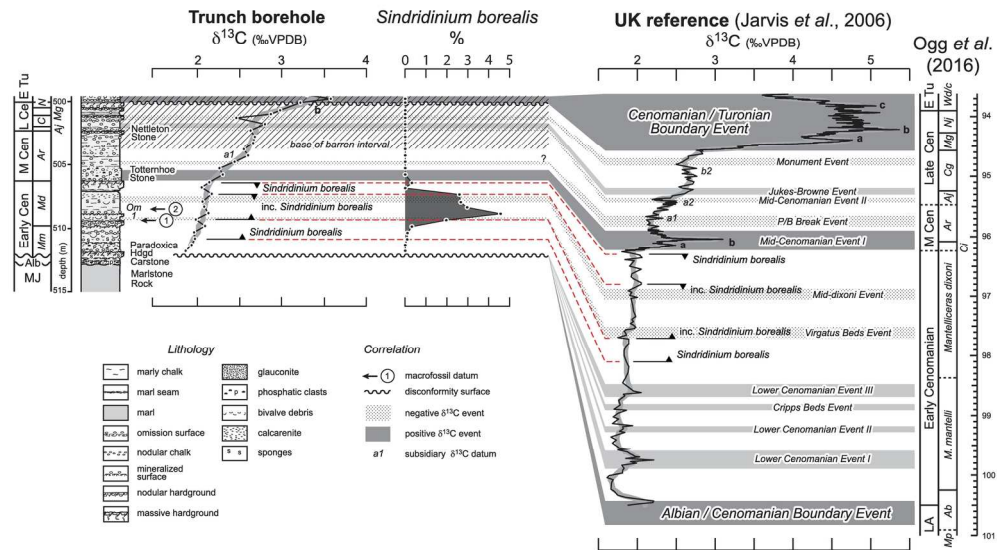

Figure 6. The stratigraphic distribution of *Sindridinium borealis* gen. et sp. nov. in the Trunch borehole (Norfolk, southeast UK, 52°51'34" N; 01°24'19" E) and its correlation to the  $\delta^{13}\text{C}$  isotope curve of Jarvis et al. (2006). As no ammonites were recovered from the Lower Cenomanian section, the limits of the ammonite zones are based in lithological correlations to ammonite calibrated sections, and by the distribution of *Inoceramus* and *Orbirhynchia* (see Wood et al., 1994). However, the acme of *S. borealis* gen. et sp. nov. clearly occurs in the Early Cenomanian, below the mid-Cenomanian  $\delta^{13}\text{C}$  isotope event I of Jarvis et al. (2006) and above the late Albian Carstone. The  $\delta^{13}\text{C}$  calibration to the GTS 2016 (recalibrated here from Jarvis et al. 2006) suggests an age range of increased abundance of *S. borealis* gen. et sp. nov. of 97.7–96.8 Ma, with the acme at 97.4 Ma, all within the *Mantelliceras dixonii* Zone.

171x104mm (300 x 300 DPI)



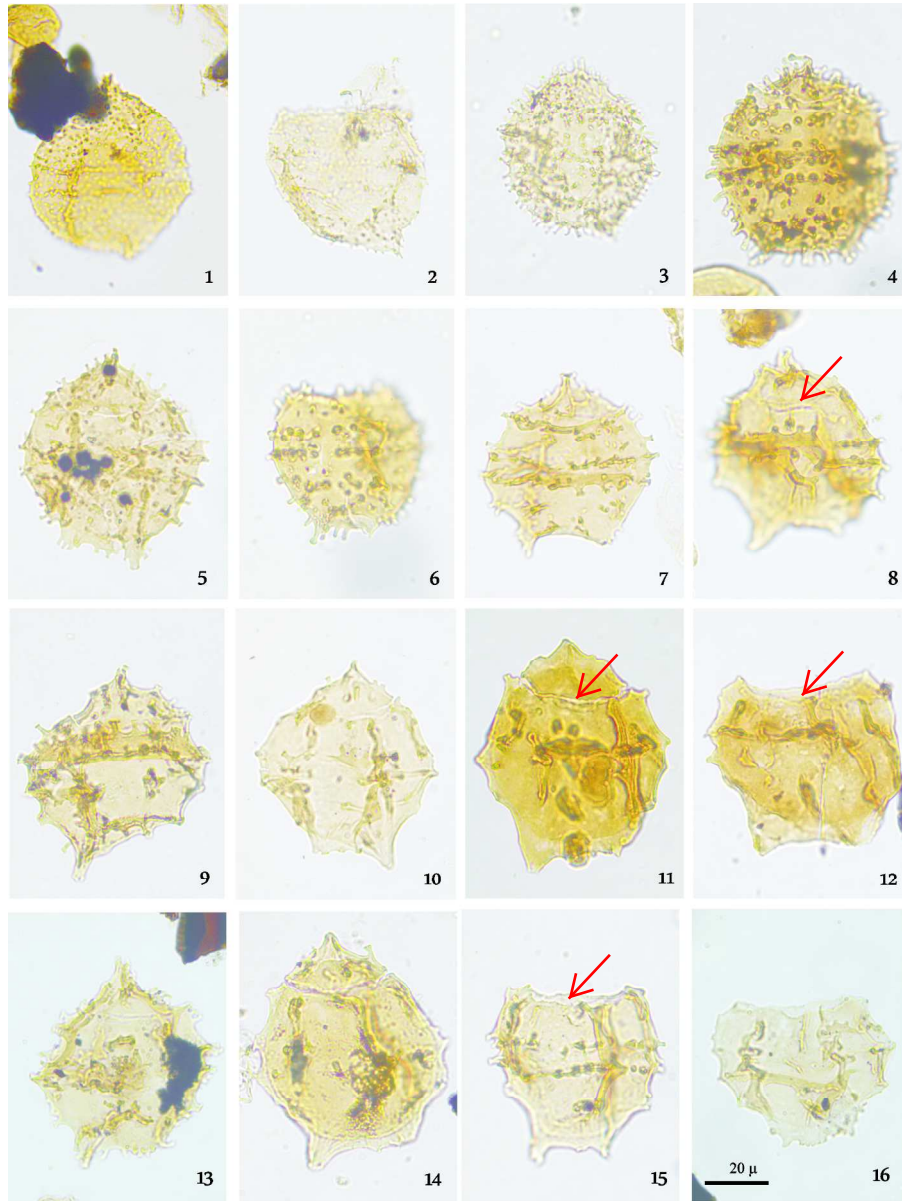

178x236mm (300 x 300 DPI)

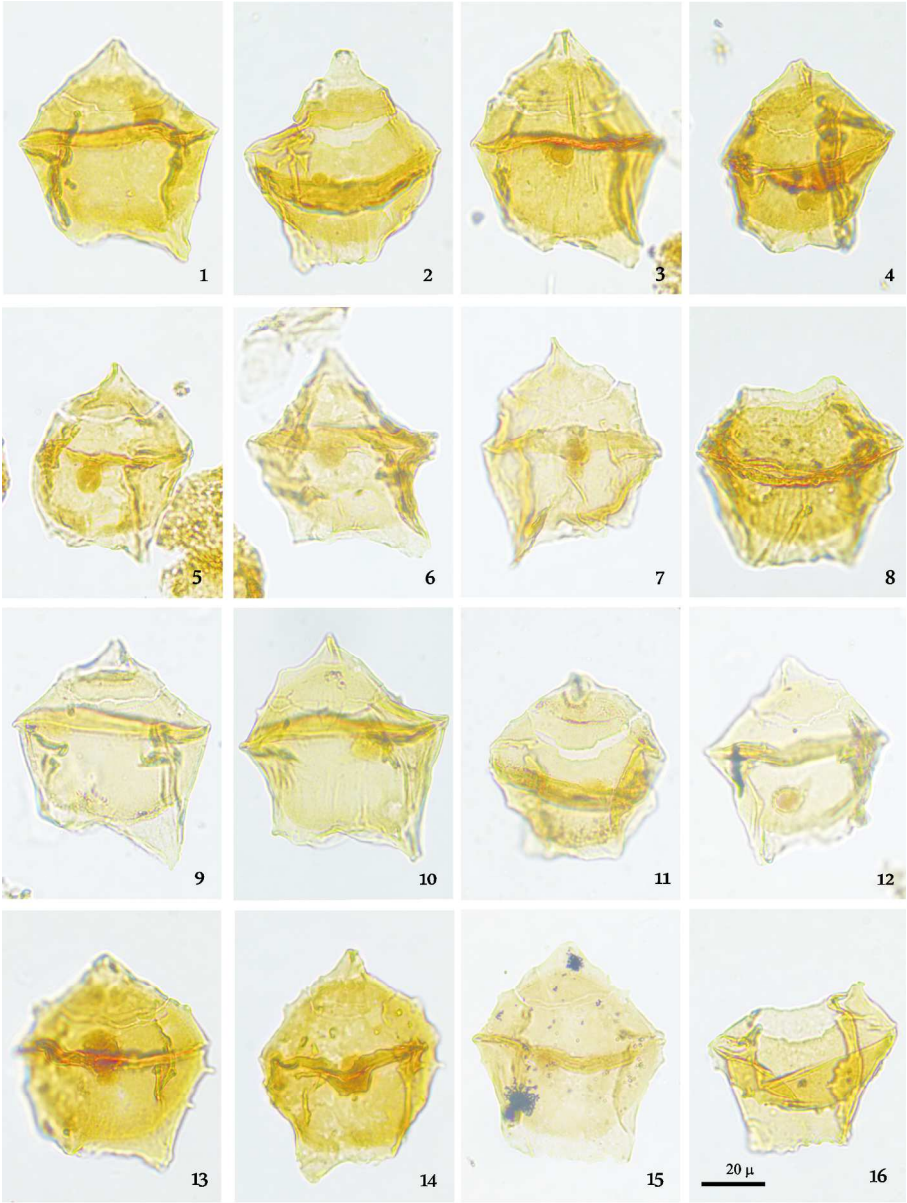

177x236mm (300 x 300 DPI)

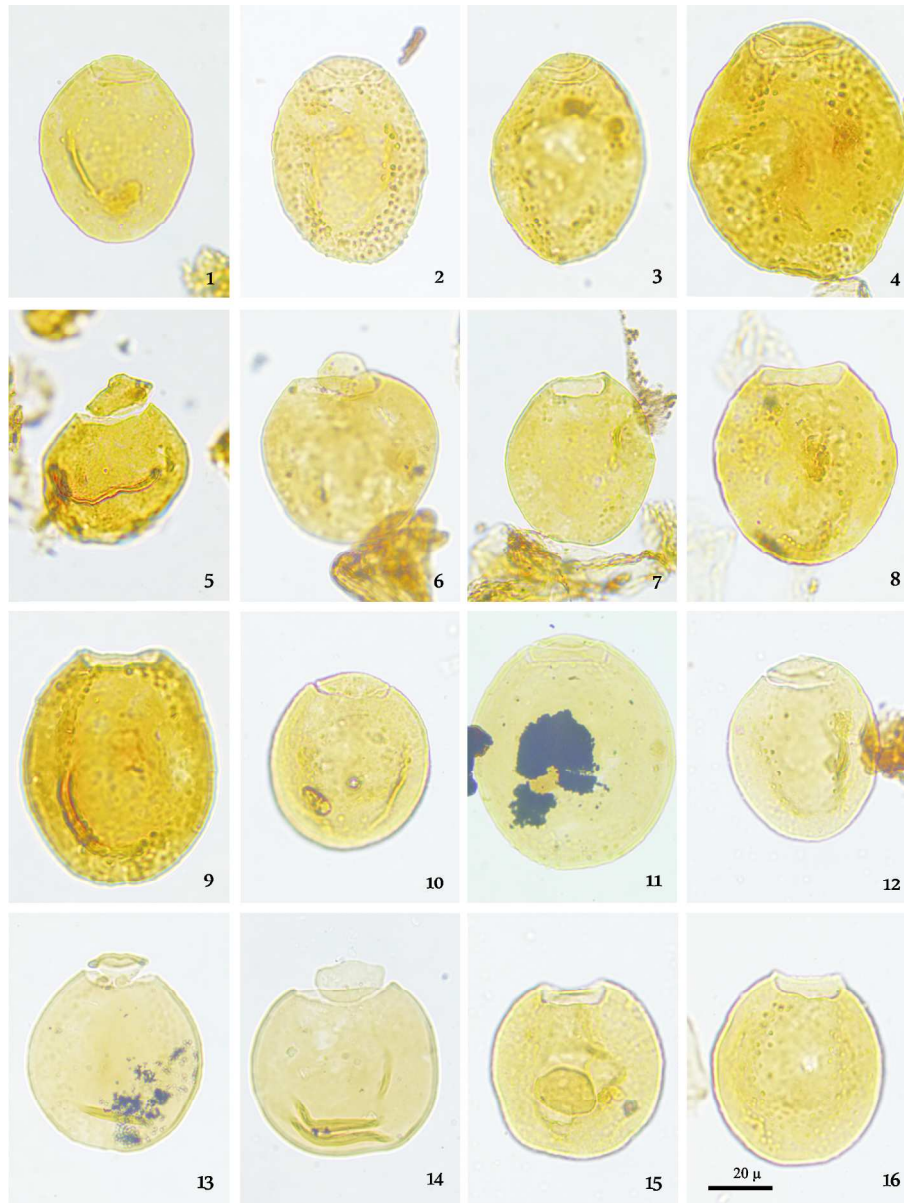

178x235mm (300 x 300 DPI)



1  
2  
3  
4  
5  
6  
7  
8  
9  
10  
11  
12  
13  
14  
15  
16  
17  
18  
19  
20  
21  
22  
23  
24  
25  
26  
27  
28  
29  
30  
31  
32  
33  
34  
35  
36  
37  
38  
39  
40  
41  
42  
43  
44  
45  
46  
47  
48  
49  
50  
51  
52  
53  
54  
55  
56  
57  
58  
59  
60

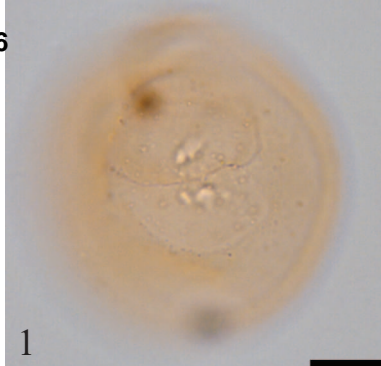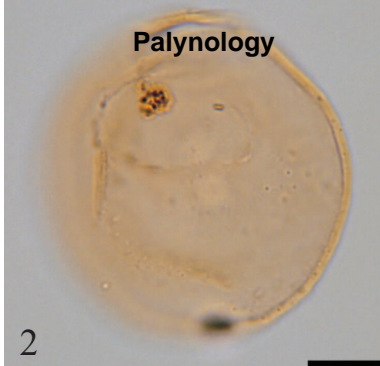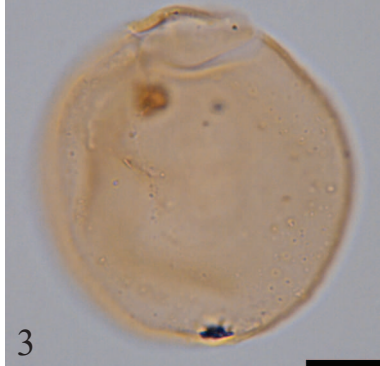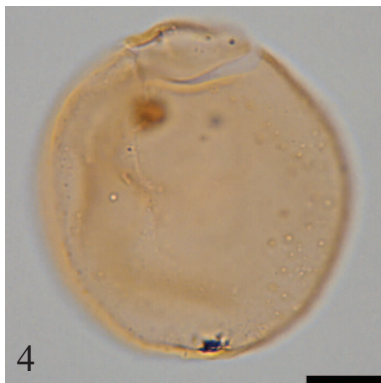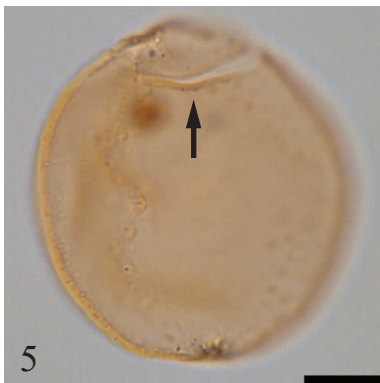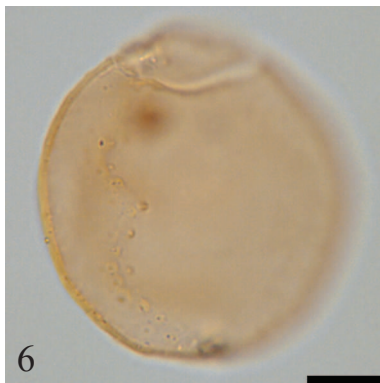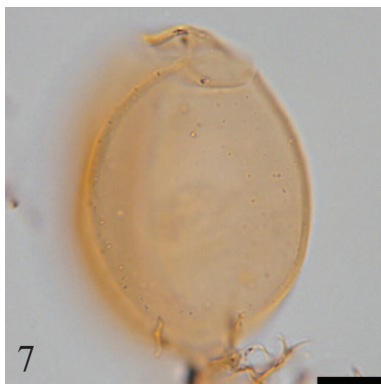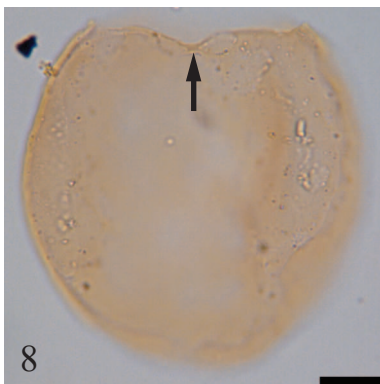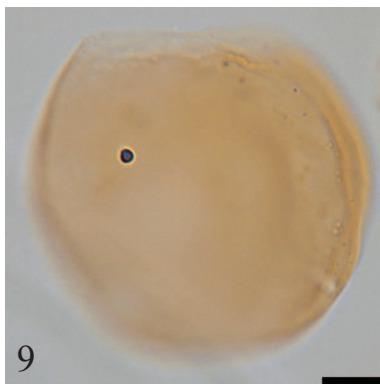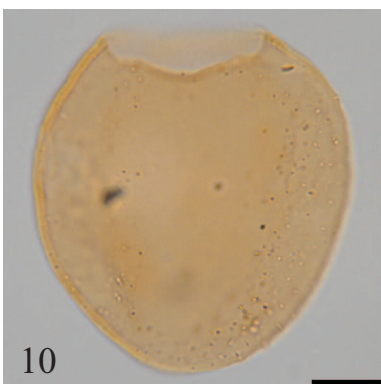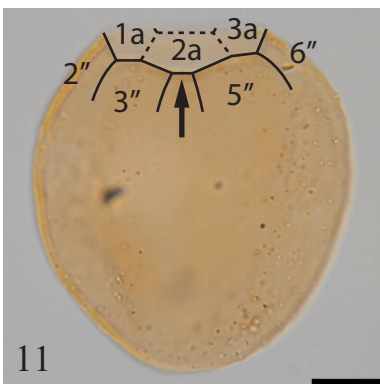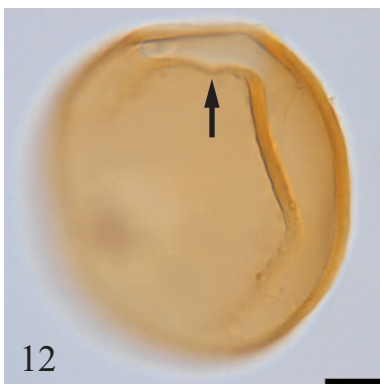

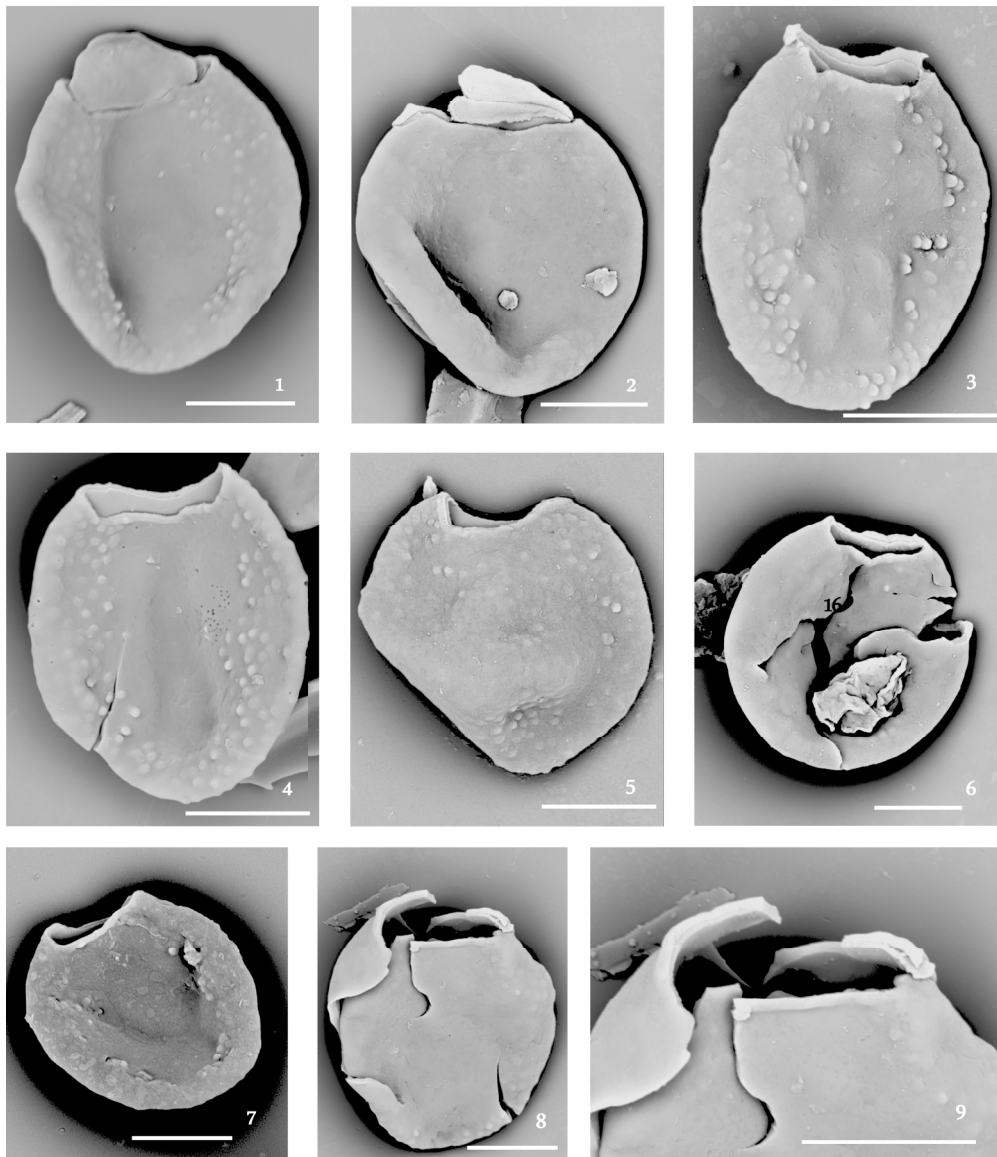

222x258mm (300 x 300 DPI)

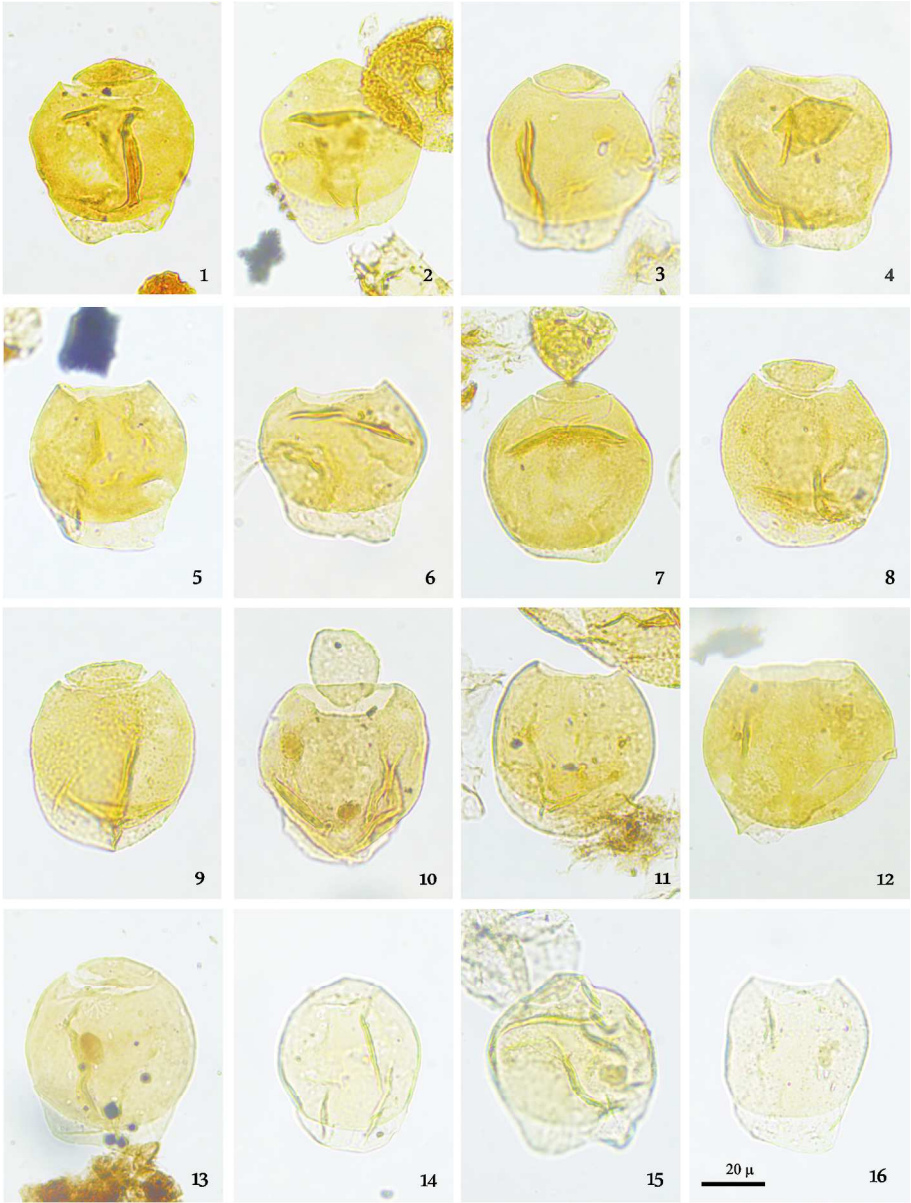

178x236mm (300 x 300 DPI)

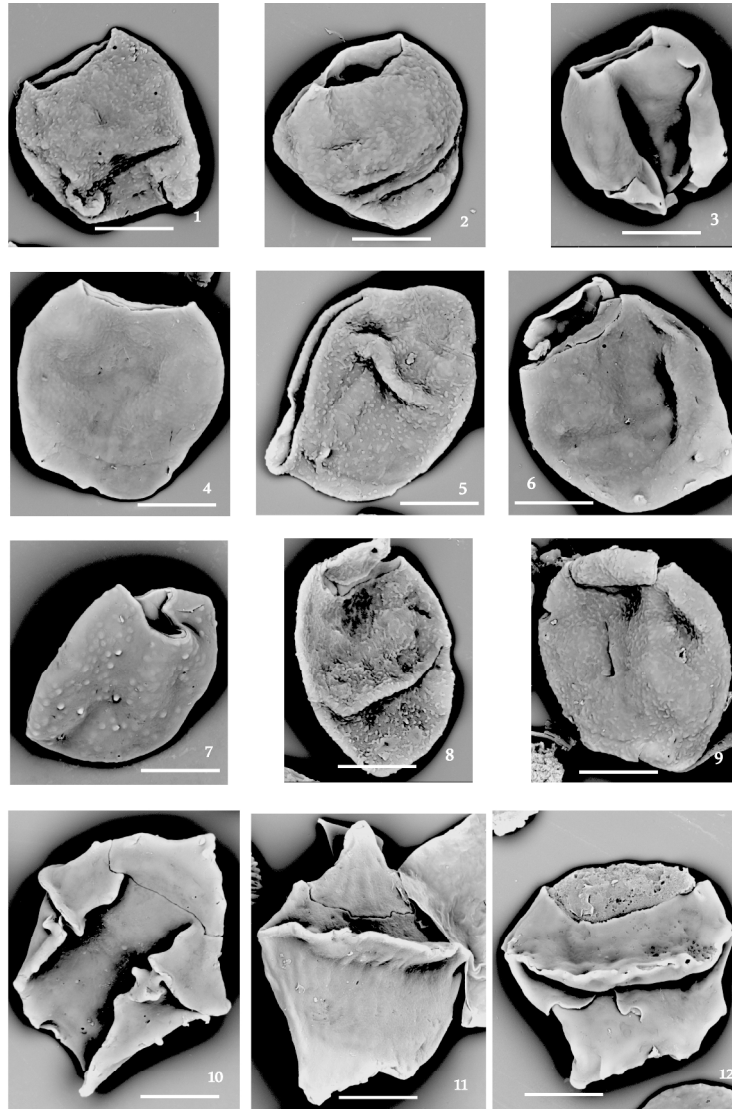

276x416mm (300 x 300 DPI)



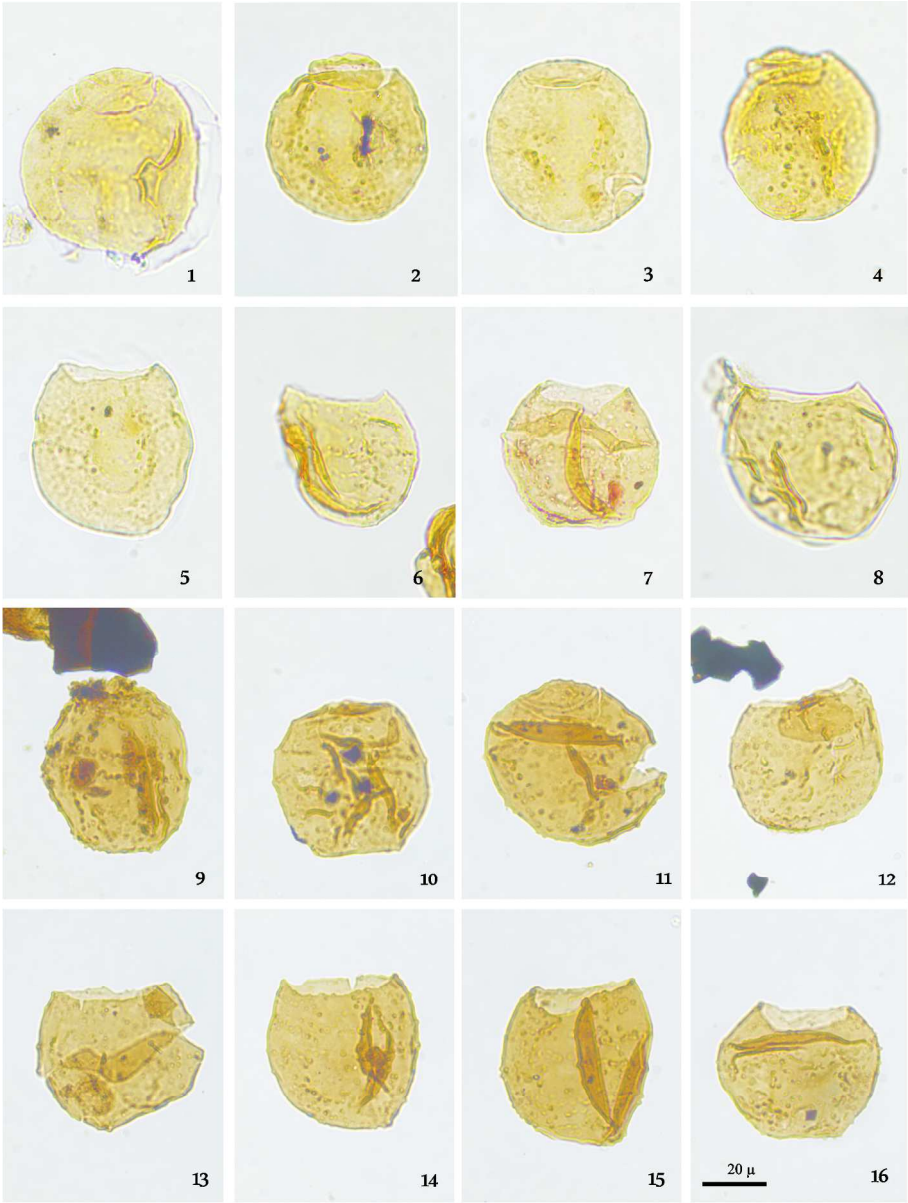

178x236mm (300 x 300 DPI)



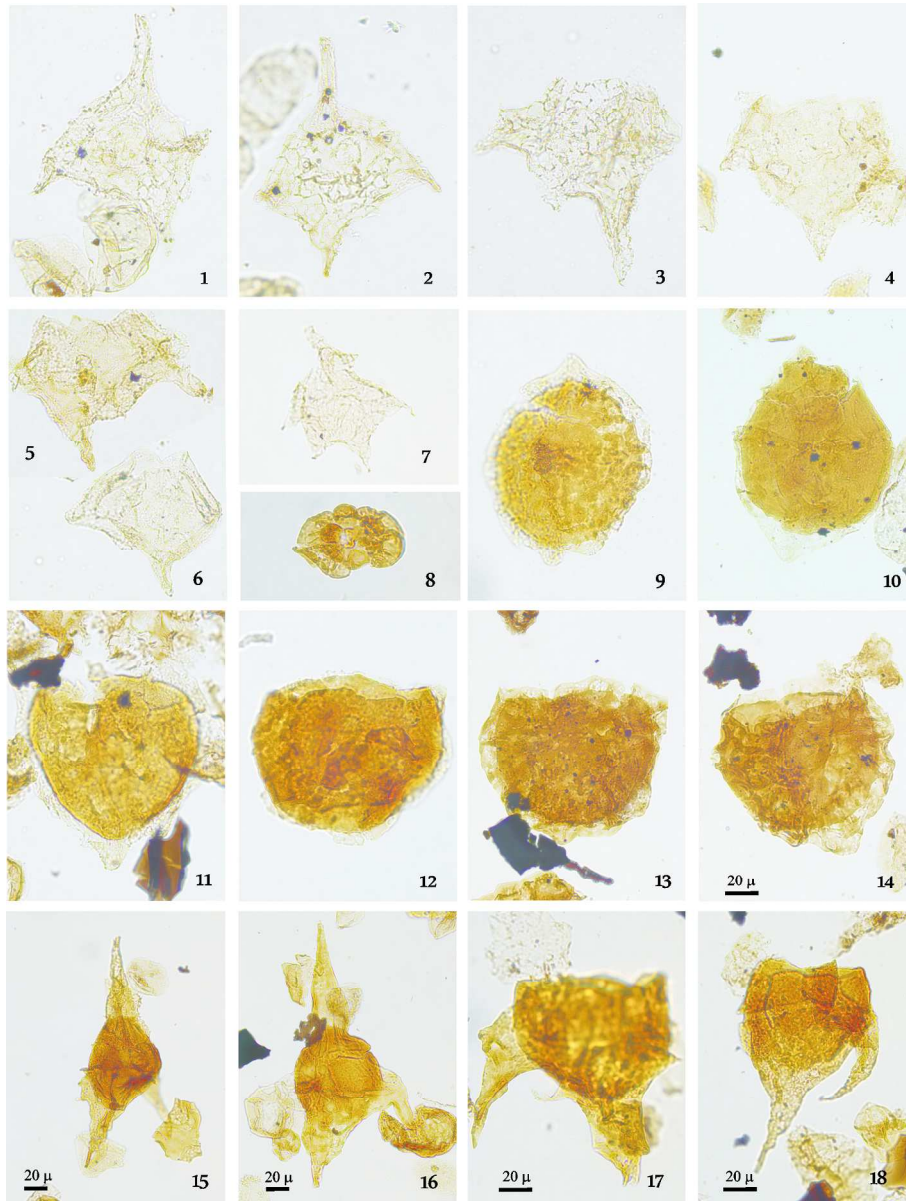

179x236mm (300 x 300 DPI)
