# Supplementary material
Source: publisher figshare collection journal article supplement (https://tandf.figshare.com/articles/dataset/_/5346112)
Supplement: Supplementary file 2 [file 1]

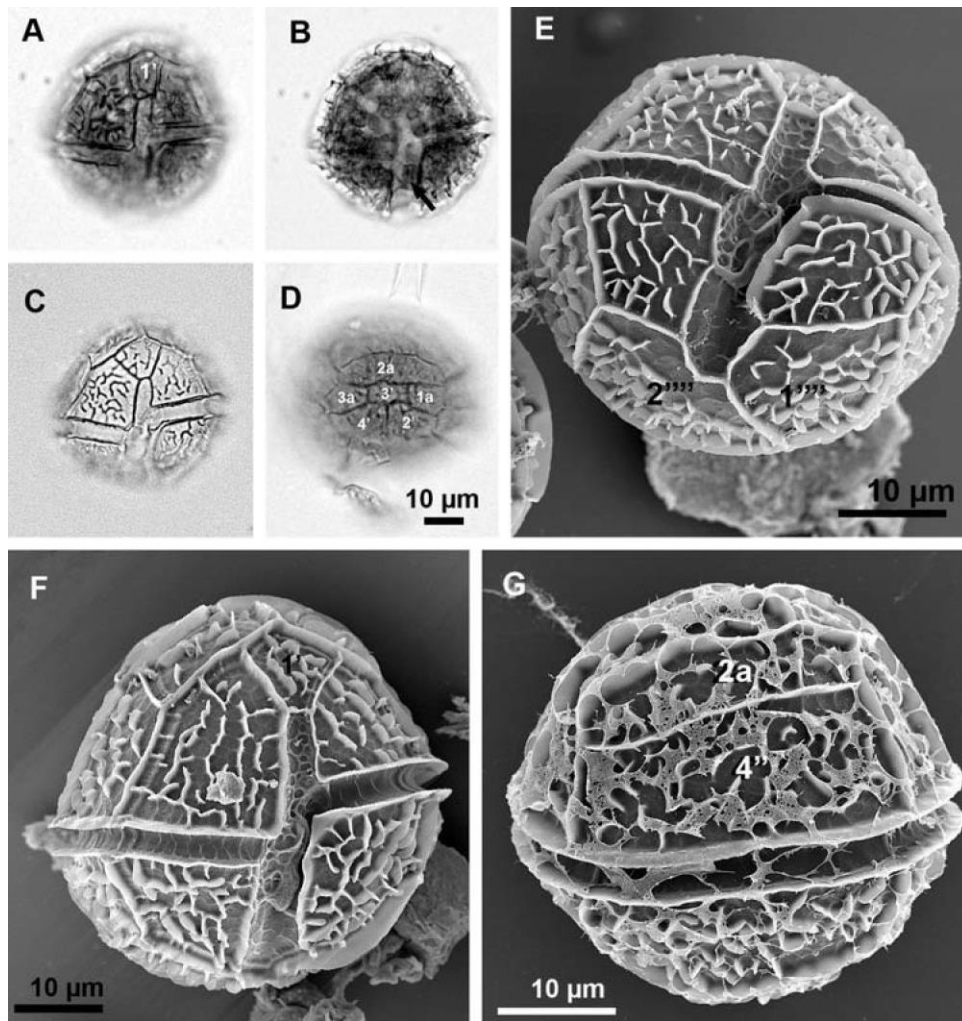

Figs ISA-G. *Peridinium volzii* f. *meandricum*. A, B. Live cells, eyespot (arrow). C, D. Empty thecae, ventral and apical view, respectively. E-G. SEM, E: antapical-ventral view F: ventral view, G: dorsal view.

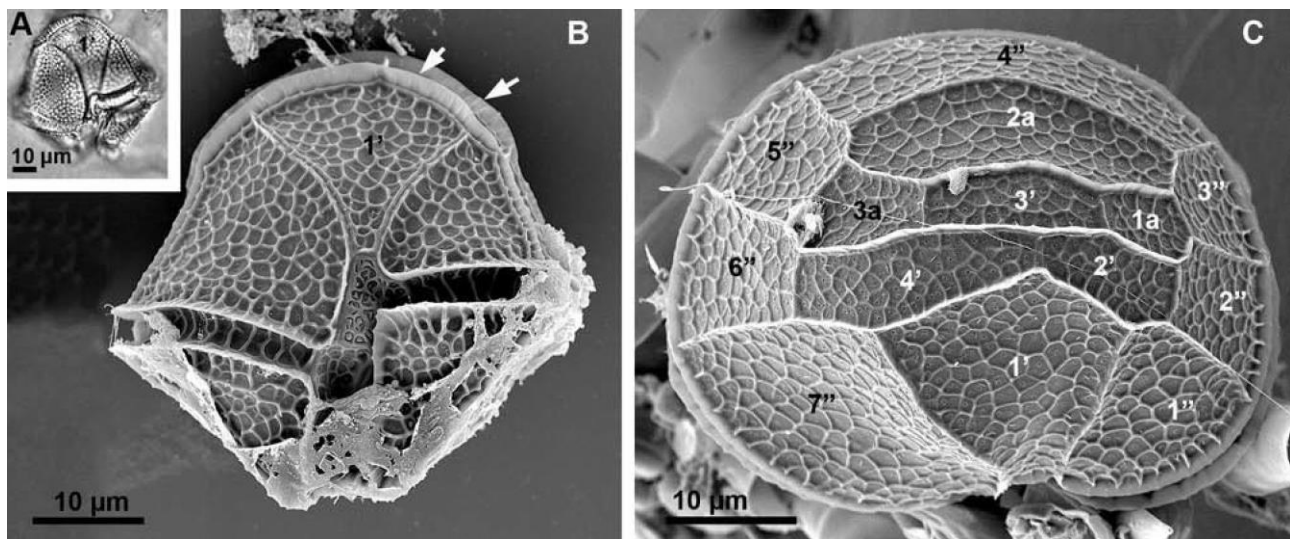

Figs 16A-C. *Peridinium willei*. A. LM of empty theca. B, C. SEM, ventral and apical view respectively. Notice wing-like extensions (arrows).

**From:** Hansen G and Flaim G, 2007. Dinoflagellates of the Trentino Province, Italy. *Journal of Limnology* 66(2): p121. Reproduced with thanks to Dr. Gert Hansen and the *Journal of Limnology* for permission to re-use this page.
