# Supplementary material
Source: publisher figshare collection journal article supplement (https://tandf.figshare.com/articles/dataset/_/5346112)
Supplement: Supplementary file 4 [file 1]

## Nøhr-Hansen, Henrik

---

**Fra:** lucy costa <gorinto@gmail.com>  
**Sendt:** 23. juni 2017 10:13  
**Til:** Nøhr-Hansen, Henrik  
**Emne:** FW: Permission request

**From:** Gert Hansen [<mailto:ghansen@snm.ku.dk>]  
**Sent:** 23 June 2017 05:32  
**To:** Lucy Costa <gorinto@gmail.com>  
**Cc:** [nadia.moscato@pagepress.org](mailto:nadia.moscato@pagepress.org)  
**Subject:** Re: Permission request

Dear Lucy,  
As for my part no problem - you are more than welcome to use my pictures as long as they are acknowledged

All the Best  
Gert

Den 22. jun. 2017 kl. 16.51 skrev Lucy Costa <gorinto@gmail.com>:

Dear Gert and Nadia,

My colleagues Henrik Nøhr-Hansen, Martin Pearce, Peter Alsen and I are preparing a paper entitled: "New Albian to Cenomanian dinoflagellate cysts taxa of ovoidinioid affinities from East Greenland, Barents Sea and England", to be submitted to the journal 'Palynology'.

The illustrations of *Peridinium votzii* and *P. willei* in your paper "Dinoflagellates of the Trentino Province, Italy." J. Limnol., 66(2): 107-141, 2007, have been very helpful in interpreting some features of our new genus, *Sindridinium*, and related taxa.

I'm writing to request your permission to include a text figure with the tabulation of *P. volzii* based on your photo plate in p.121, in our paper. If possible, also include a pdf or ppt of that photo plate (unmodified) in a supplemental web space the journal offers together with Figshare. We believe that these illustrations will be of considerable interest to palynologists working with fossil peridinioid cysts. Your paper (and J of Limnol.) will of course be referenced and acknowledged.

As the manuscript is due for submission on Tuesday 27 June, we'd be very grateful for a prompt reply.

With best regards

Lucy Costa
