# Supplementary material
Source: publisher figshare collection journal article supplement (https://tandf.figshare.com/articles/dataset/_/5346112)
Supplement: Supplementary file 5 [file 1]

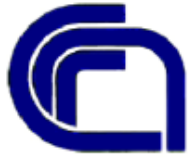

Verbania, June 23, 2017

## To Whom It May Concern

The paper:

“Dinoflagellates of the Trentino Province, Italy.” by Gert Hansen and Giovanna Flaim, was published in J. Limnol., 66(2): 107-141, 2007 and it is accessible through DOI: 10.4081/jlimnol.2007.107

The permission to re-use the pictures of the article is granted ensuring that the source is properly acknowledged.

The Journal of Limnology [eISSN 1723-8633, ISSN: 1129-5767] is an Open Access, peer-reviewed journal published by PAGEPress®, Pavia, Italy. The electronic version is available at the website [www.jlimnol.it](http://www.jlimnol.it), and the printed version is issued in 50 exemplars. The Journal of Limnology is property of Institute of Ecosystem Study of CNR (National Research Council of Italy), Verbania, Italy

Impact Factor & Metrics:

ISI Impact Factor 2016: 1.451

Eigenfactor™ Score: 0.00214

Yours sincerely,

Roberto Bertoni  
(Editor-in-Chief)
